# Supplementary material for: Worldwide cancer statistics of adolescents and young adults in 2019: a systematic analysis of the Global Burden of Disease Study 2019
Source: PubMed Central journal article supplement — ESMO Open. 2021 Sep 1;6(5):100255. doi: 10.1016/j.esmoop.2021.100255 (PMC8417345; doi:10.1016/j.esmoop.2021.100255), 2021-09-01
Supplement: mmc1.pdf [file mmc1.pdf]

**Supplementary Table S1. Worldwide incidence (A) and deaths (B) of the top 10 cancer types among 15–39 year-olds from 1990 to 2019.**

**A**

| Year | Gender | Incidence rate (per 100,000) NO. 95% UI |                          |                  |                  |                   |                 |                   |                      |                    |                  |
|------|--------|-----------------------------------------|--------------------------|------------------|------------------|-------------------|-----------------|-------------------|----------------------|--------------------|------------------|
|      |        | Breast                                  | Non-melanoma skin cancer | Cervical cancer  | Leukemia         | Colorectal cancer | Brain and CNS   | Testicular cancer | Non-Hodgkin lymphoma | Stomach            | Thyroid          |
| 1990 | both   | 4.09 (4.32-3.85)                        | 4.01 (5.27-3.03)         | 3.80 (4.39-3.30) | 3.69 (4.08-3.21) | 1.70(1.80-1.61)   | 1.62(2.01-1.40) | 1.31(1.44-1.06)   | 1.44(1.64-1.29)      | 2.19 (2.33-2.03)   | 0.89 (0.98-0.76) |
| 1991 | both   | 4.16 (4.37-3.94)                        | 4.00 (5.26-3.03)         | 3.79 (4.34-3.31) | 3.66 (4.03-3.20) | 1.73(1.83-1.63)   | 1.63(2.01-1.39) | 1.33(1.45-1.10)   | 1.47(1.66-1.31)      | 2.16 (2.29-2.02)   | 0.91 (1.00-0.78) |
| 1992 | both   | 4.22 (4.44-3.98)                        | 3.99 (5.25-3.02)         | 3.80 (4.32-3.32) | 3.65 (4.01-3.21) | 1.75(1.84-1.67)   | 1.64(2.01-1.41) | 1.34(1.48-1.14)   | 1.48(1.66-1.33)      | 2.14 (2.26-2.01)   | 0.94 (1.03-0.81) |
| 1993 | both   | 4.33 (4.54-4.12)                        | 3.98 (5.22-3.01)         | 3.82 (4.42-3.35) | 3.64 (3.97-3.22) | 1.79(1.87-1.70)   | 1.66(2.01-1.42) | 1.37(1.51-1.18)   | 1.51(1.69-1.36)      | 2.12 (2.23-2.00)   | 0.97 (1.06-0.84) |
| 1994 | both   | 4.45 (4.66-4.23)                        | 3.96 (5.18-3.00)         | 3.89 (4.56-3.41) | 3.69 (4.00-3.26) | 1.82(1.90-1.75)   | 1.68(2.05-1.44) | 1.38(1.53-1.23)   | 1.54(1.72-1.39)      | 2.13(2.23-2.03)    | 1.01 (1.10-0.87) |
| 1995 | both   | 4.54 (4.77-4.32)                        | 3.93 (5.16-2.99)         | 3.93 (4.55-3.46) | 3.72 (4.04-3.31) | 1.84(1.93-1.76)   | 1.70(2.05-1.45) | 1.39(1.54-1.24)   | 1.55(1.74-1.40)      | 2.12 (2.22-2.02)   | 1.05 (1.14-0.89) |
| 1996 | both   | 4.58 (4.81-4.35)                        | 3.88 (5.09-2.96)         | 3.93 (4.60-3.45) | 3.71 (4.01-3.26) | 1.86(1.94-1.78)   | 1.72(2.02-1.44) | 1.41(1.56-1.25)   | 1.55(1.73-1.40)      | 2.08 (2.18 -1.98 ) | 1.08 (1.17-0.91) |
| 1997 | both   | 4.64 (4.86-4.40)                        | 3.78 (4.95-2.87)         | 3.96 (4.61-3.51) | 3.71 (4.01-3.28) | 1.88(1.96-1.80)   | 1.74(2.03-1.45) | 1.42(1.56-1.27)   | 1.56(1.73-1.41)      | 2.06 (2.15-1.96)   | 1.11 (1.21-0.94) |
| 1998 | both   | 4.72 (4.97-4.45)                        | 3.66 (4.79-2.79)         | 4.01 (4.67-3.50) | 3.76 (4.07-3.31) | 1.90(2.00-1.83)   | 1.77(2.05-1.47) | 1.44(1.57-1.29)   | 1.56(1.74-1.41)      | 2.08 (2.19-1.96)   | 1.15 (1.25-0.96) |
| 1999 | both   | 4.79 (5.05-4.50)                        | 3.58 (4.67-2.73)         | 4.05 (4.67-3.54) | 3.79 (4.11-3.32) | 1.96(2.06-1.86)   | 1.80(2.06-1.48) | 1.46(1.60-1.31)   | 1.56(1.74-1.40)      | 2.11 (2.22-2.00)   | 1.18(1.29-0.96)  |
| 2000 | both   | 4.85 (5.12-4.56)                        | 3.52 (4.63-2.69)         | 4.09 (4.66-3.56) | 3.78 (4.11-3.32) | 2.00(2.10-1.90)   | 1.82(2.06-1.48) | 1.47(1.61-1.31)   | 1.57(1.75-1.40)      | 2.14 (2.25-2.03)   | 1.21(1.32-1.00)  |
| 2001 | both   | 4.91 (5.18-4.63)                        | 3.63 (4.74-2.82)         | 4.11 (4.68-3.58) | 3.74 (4.03-3.31) | 2.03(2.14-1.93)   | 1.82(2.05-1.50) | 1.46(1.60-1.31)   | 1.55(1.74-1.40)      | 2.14 (2.26-2.04)   | 1.23(1.32-1.04)  |
| 2002 | both   | 4.84 (5.07-4.57)                        | 3.93 (5.01-3.10)         | 4.06 (4.55-3.52) | 3.66 (3.92-3.28) | 2.05(2.13-1.96)   | 1.82(2.03-1.51) | 1.47(1.62-1.33)   | 1.53(1.70-1.38)      | 2.11(2.21-2.00)    | 1.22(1.32-1.04)  |
| 2003 | both   | 4.76 (4.98-4.54)                        | 4.26(5.37-3.42)          | 3.98 (4.43-3.46) | 3.60 (3.85-3.25) | 2.06(2.15-1.97)   | 1.81(2.00-1.49) | 1.49(1.64-1.36)   | 1.52(1.69-1.38)      | 2.07 (2.17-1.98)   | 1.23(1.31-1.05)  |
| 2004 | both   | 4.75(4.95-4.56)                         | 4.52(5.63-3.65)          | 3.95 (4.38-3.41) | 3.56 (3.79-3.22) | 2.09(2.20-1.99)   | 1.81(2.02-1.51) | 1.50(1.64-1.38)   | 1.53(1.69-1.38)      | 2.06 (2.17-1.96)   | 1.25(1.33-1.08)  |
| 2005 | both   | 4.78 (4.99-4.60)                        | 4.60(5.57-3.73)          | 3.94 (4.32-3.42) | 3.51 (3.75-3.18) | 2.10(2.22-2.00)   | 1.82(2.01-1.52) | 1.51(1.68-1.40)   | 1.54(1.71-1.40)      | 2.01 (2.13-1.92)   | 1.28(1.37-1.10)  |
| 2006 | both   | 4.77(4.96-4.59)                         | 4.58(5.69-3.71)          | 3.89 (4.25-3.35) | 3.43 (3.65-3.13) | 2.09(2.21-2.00)   | 1.82(2.00-1.51) | 1.52(1.70-1.40)   | 1.55(1.72-1.41)      | 1.92( 2.04- 1.83)  | 1.31(1.39-1.12)  |
| 2007 | both   | 4.79(4.98-4.61)                         | 4.56(5.67-3.69)          | 3.84 (4.20-3.34) | 3.40 (3.63-3.12) | 2.10(2.23-2.02)   | 1.84(2.00-1.53) | 1.56(1.73-1.44)   | 1.56(1.74-1.42)      | 1.87( 1.99- 1.79)  | 1.35(1.43-1.15)  |
| 2008 | both   | 4.86(5.06-4.67)                         | 4.55(5.65-3.67)          | 3.84 (4.17-3.37) | 3.42 (3.62-3.13) | 2.15(2.28-2.07)   | 1.87(2.04-1.54) | 1.60(1.77-1.47)   | 1.60(1.78-1.46)      | 1.84 (1.96- 1.76)  | 1.39(1.48-1.18)  |
| 2009 | both   | 4.95(5.15-4.75)                         | 4.53(5.63-3.66)          | 3.87 (4.24-3.36) | 3.43 (3.62-3.15) | 2.20(2.35-2.11)   | 1.90(2.06-1.56) | 1.64(1.80-1.51)   | 1.63(1.81-1.48)      | 1.83( 1.94-1.75)   | 1.43(1.52-1.20)  |
| 2010 | both   | 5.02(5.24-4.81)                         | 4.50(5.61-3.63)          | 3.89 (4.22-3.39) | 3.41 (3.62-3.15) | 2.24(2.38-2.14)   | 1.91(2.08-1.59) | 1.67(1.83-1.53)   | 1.65(1.85-1.50)      | 1.80 (1.92-1.72)   | 1.46(1.56-1.23)  |
| 2011 | both   | 5.05(5.29-4.82)                         | 4.48(5.57-3.61)          | 3.88 (4.20-3.37) | 3.37 (3.58-3.10) | 2.21(2.35-2.12)   | 1.91(2.08-1.58) | 1.68(1.84-1.55)   | 1.65(1.84-1.50)      | 1.73 (1.84-1.65)   | 1.46(1.55-1.24)  |
| 2012 | both   | 5.04 (5.28-4.82)                        | 4.48(5.57-3.61)          | 3.84 (4.20-3.32) | 3.29 (3.47-3.03) | 2.19(2.31-2.10)   | 1.91(2.09-1.56) | 1.68(1.84-1.55)   | 1.63(1.83-1.49)      | 1.65(1.76-1.57)    | 1.43(1.52-1.23)  |
| 2013 | both   | 5.13(5.38-4.87)                         | 4.50(5.61-3.62)          | 3.87 (4.22-3.33) | 3.27 (3.45-3.00) | 2.21(2.34-2.12)   | 1.92(2.07-1.57) | 1.71(1.89-1.58)   | 1.63(1.83-1.49)      | 1.61 (1.72-1.53)   | 1.43(1.53-1.22)  |
| 2014 | both   | 5.20(5.49-4.94)                         | 4.53(5.65-3.64)          | 3.87 (4.23-3.32) | 3.28 (3.47-3.01) | 2.27(2.41-2.17)   | 1.95(2.13-1.57) | 1.75(1.94-1.60)   | 1.64(1.83-1.49)      | 1.61(1.71-1.53)    | 1.43(1.52-1.24)  |
| 2015 | both   | 5.29(5.56-5.01)                         | 4.57(5.70-3.67)          | 3.88 (4.25-3.30) | 3.28 (3.47-2.99) | 2.30(2.43-2.18)   | 1.97(2.13-1.58) | 1.78(1.97-1.63)   | 1.65(1.83-1.51)      | 1.58 (1.69-1.49)   | 1.43(1.54-1.25)  |
| 2016 | both   | 5.38(5.70-5.07)                         | 4.62(5.76-3.70)          | 3.90 (4.30-3.31) | 3.27 (3.49-2.96) | 2.33(2.47-2.20)   | 1.98(2.16-1.58) | 1.81(2.00-1.65)   | 1.66(1.84-1.51)      | 1.58(1.68-1.49)    | 1.45(1.56-1.28)  |
| 2017 | both   | 5.49(5.91-5.09)                         | 4.66(5.82-3.74)          | 3.93 (4.37-3.32) | 3.32 (3.56-2.99) | 2.41(2.58-2.26)   | 2.01(2.22-1.59) | 1.85(2.13-1.68)   | 1.69(1.89-1.53)      | 1.60 (1.72-1.50)   | 1.48(1.62-1.31)  |
| 2018 | both   | 5.63(6.12-5.13)                         | 4.70(5.89-3.75)          | 3.99 (4.49-3.37) | 3.39 (3.66-3.05) | 2.50(2.70-2.32)   | 2.05(2.29-1.62) | 1.90(2.13-1.71)   | 1.74(1.96-1.57)      | 1.64(1.77-1.52)    | 1.54(1.69-1.35)  |
| 2019 | both   | 5.72(6.28-5.19)                         | 4.74(5.98-3.76)          | 4.02 (4.57-3.36) | 3.41 (3.72-3.03) | 2.56(2.79-2.37)   | 2.07(2.33-1.62) | 1.93(2.19-1.74)   | 1.77(1.98-1.59)      | 1.65(1.79-1.52)    | 1.58(1.74-1.37)  |

## B

| Year | Gender | Death rate (per 100,000) NO. 95% UI |                 |                 |                          |                 |                        |                 |                      |                 |                     |
|------|--------|-------------------------------------|-----------------|-----------------|--------------------------|-----------------|------------------------|-----------------|----------------------|-----------------|---------------------|
|      |        | Leukemia                            | Breast          | Brain and CNS   | <u>Colorectal cancer</u> | Stomach         | <u>Cervical cancer</u> | Lung            | Non-Hodgkin lymphoma | Liver           | Lip and oral cavity |
| 1990 | both   | 2.26(2.51-1.96)                     | 1.37(1.47-1.26) | 1.01(1.27-0.86) | 0.90(0.96-0.84)          | 1.61(1.72-1.49) | 1.09(1.27-0.92)        | 1.07(1.16-0.99) | 0.69(0.75-0.64)      | 1.34(1.54-1.17) | 0.26(0.28-0.24)     |
| 1991 | both   | 2.22(2.47-1.93)                     | 1.37(1.47-1.27) | 1.01(1.28-0.86) | 0.90(0.96-0.85)          | 1.58(1.68-1.47) | 1.08(1.30-0.92)        | 1.08(1.16-1.01) | 0.70(0.75-0.64)      | 1.37(1.55-1.21) | 0.26(0.28-0.25)     |
| 1992 | both   | 2.20(2.42-1.92)                     | 1.39(1.48-1.28) | 1.02(1.25-0.86) | 0.91(0.97-0.86)          | 1.56(1.67-1.46) | 1.08(1.29-0.92)        | 1.08(1.15-1.01) | 0.70(0.75-0.65)      | 1.40(1.57-1.26) | 0.27(0.28-0.25)     |
| 1993 | both   | 2.17(2.39-1.90)                     | 1.40(1.50-1.31) | 1.02(1.24-0.87) | 0.92(0.97-0.88)          | 1.54(1.63-1.45) | 1.07(1.27-0.91)        | 1.09(1.15-1.02) | 0.71(0.76-0.66)      | 1.41(1.55-1.27) | 0.27(0.29-0.25)     |
| 1994 | both   | 2.18(2.39-1.93)                     | 1.43(1.53-1.34) | 1.03(1.27-0.88) | 0.93(0.98-0.89)          | 1.55(1.63-1.46) | 1.09(1.31-0.94)        | 1.10(1.16-1.04) | 0.72(0.77-0.67)      | 1.44(1.57-1.30) | 0.28(0.29-0.26)     |
| 1995 | both   | 2.18(2.39-1.92)                     | 1.45(1.55-1.35) | 1.03(1.26-0.87) | 0.94(0.99-0.89)          | 1.54(1.62-1.46) | 1.09(1.30-0.94)        | 1.11(1.17-1.05) | 0.72(0.77-0.67)      | 1.45(1.58-1.33) | 0.28(0.30-0.27)     |
| 1996 | both   | 2.16(2.36-1.90)                     | 1.45(1.54-1.35) | 1.04(1.24-0.87) | 0.94(0.98-0.89)          | 1.50(1.57-1.42) | 1.08(1.29-0.92)        | 1.10(1.16-1.05) | 0.72(0.76-0.67)      | 1.44(1.56-1.33) | 0.28(0.30-0.27)     |
| 1997 | both   | 2.13(2.34-1.88)                     | 1.45(1.55-1.35) | 1.04(1.24-0.86) | 0.94(0.98-0.89)          | 1.48(1.55-1.40) | 1.08(1.29-0.94)        | 1.09(1.15-1.04) | 0.72(0.76-0.67)      | 1.41(1.52-1.31) | 0.29(0.31-0.27)     |
| 1998 | both   | 2.13(2.34-1.86)                     | 1.47(1.57-1.35) | 1.05(1.23-0.86) | 0.95(1.00-0.89)          | 1.49(1.56-1.40) | 1.09(1.31-0.93)        | 1.10(1.15-1.04) | 0.72(0.76-0.66)      | 1.40(1.51-1.31) | 0.29(0.31-0.27)     |
| 1999 | both   | 2.13(2.33-1.88)                     | 1.48(1.58-1.36) | 1.06(1.24-0.86) | 0.96(1.01-0.90)          | 1.50(1.58-1.42) | 1.09(1.30-0.94)        | 1.10(1.16-1.05) | 0.72(0.77-0.66)      | 1.39(1.50-1.29) | 0.30(0.32-0.29)     |
| 2000 | both   | 2.11(2.32-1.85)                     | 1.49(1.60-1.37) | 1.07(1.23-0.86) | 0.97(1.02-0.92)          | 1.52(1.60-1.44) | 1.10(1.30-0.95)        | 1.12(1.18-1.05) | 0.72(0.77-0.66)      | 1.33(1.44-1.22) | 0.30(0.32-0.29)     |
| 2001 | both   | 2.07(2.27-1.83)                     | 1.49(1.60-1.38) | 1.06(1.21-0.87) | 0.97(1.03-0.92)          | 1.52(1.60-1.44) | 1.10(1.30-0.95)        | 1.10(1.17-1.04) | 0.71(0.76-0.66)      | 1.21(1.31-1.12) | 0.30(0.32-0.29)     |
| 2002 | both   | 2.00(2.18-1.77)                     | 1.45(1.56-1.35) | 1.05(1.19-0.86) | 0.96(1.02-0.92)          | 1.48(1.55-1.40) | 1.08(1.25-0.93)        | 1.07(1.13-1.02) | 0.69(0.74-0.64)      | 1.04(1.13-0.96) | 0.30(0.32-0.28)     |
| 2003 | both   | 1.94(2.10-1.72)                     | 1.41(1.50-1.32) | 1.03(1.17-0.85) | 0.95(1.00-0.90)          | 1.43(1.50-1.36) | 1.05(1.20-0.91)        | 1.03(1.09-0.98) | 0.68(0.72-0.64)      | 0.91(0.98-0.85) | 0.30(0.31-0.28)     |
| 2004 | both   | 1.90(2.05-1.70)                     | 1.39(1.47-1.31) | 1.02(1.16-0.84) | 0.95(1.00-0.89)          | 1.40(1.48-1.34) | 1.03(1.14-0.89)        | 1.00(1.06-0.95) | 0.68(0.72-0.64)      | 0.81(0.87-0.77) | 0.29(0.31-0.28)     |
| 2005 | both   | 1.85(2.00-1.67)                     | 1.38(1.45-1.30) | 1.01(1.14-0.83) | 0.94(0.99-0.89)          | 1.35(1.43-1.28) | 1.02(1.14-0.88)        | 0.97(1.03-0.92) | 0.68(0.73-0.64)      | 0.75(0.80-0.70) | 0.30(0.32-0.28)     |
| 2006 | both   | 1.80(1.93-1.62)                     | 1.36(1.44-1.29) | 1.00(1.11-0.82) | 0.92(0.97-0.87)          | 1.28(1.36-1.21) | 0.99(1.11-0.85)        | 0.93(0.99-0.89) | 0.68(0.72-0.64)      | 0.71(0.76-0.67) | 0.30(0.32-0.28)     |
| 2007 | both   | 1.76(1.89-1.59)                     | 1.35(1.42-1.28) | 0.99(1.10-0.82) | 0.91(0.96-0.86)          | 1.22(1.30-1.16) | 0.97(1.07-0.84)        | 0.91(0.97-0.87) | 0.68(0.72-0.64)      | 0.68(0.73-0.64) | 0.30(0.32-0.29)     |
| 2008 | both   | 1.74(1.86-1.58)                     | 1.35(1.41-1.28) | 0.99(1.09-0.81) | 0.91(0.96-0.87)          | 1.18(1.26-1.13) | 0.96(1.06-0.82)        | 0.90(0.95-0.85) | 0.69(0.73-0.64)      | 0.68(0.73-0.64) | 0.31(0.33-0.29)     |
| 2009 | both   | 1.72(1.83-1.55)                     | 1.35(1.43-1.27) | 0.99(1.10-0.81) | 0.91(0.97-0.87)          | 1.15(1.21-1.10) | 0.95(1.04-0.81)        | 0.88(0.94-0.84) | 0.69(0.73-0.65)      | 0.66(0.73-0.61) | 0.31(0.33-0.29)     |
| 2010 | both   | 1.69(1.82-1.53)                     | 1.35(1.43-1.28) | 0.98(1.07-0.80) | 0.91(0.97-0.86)          | 1.11(1.18-1.06) | 0.94(1.03-0.81)        | 0.87(0.92-0.82) | 0.69(0.74-0.65)      | 0.64(0.70-0.60) | 0.31(0.34-0.29)     |
| 2011 | both   | 1.65(1.76-1.49)                     | 1.35(1.43-1.27) | 0.97(1.06-0.79) | 0.89(0.95-0.85)          | 1.06(1.13-1.01) | 0.93(1.03-0.80)        | 0.83(0.89-0.80) | 0.69(0.74-0.65)      | 0.61(0.67-0.57) | 0.31(0.34-0.29)     |
| 2012 | both   | 1.60(1.71-1.44)                     | 1.34(1.42-1.27) | 0.96(1.05-0.78) | 0.87(0.93-0.83)          | 1.01(1.07-0.96) | 0.92(1.00-0.78)        | 0.81(0.85-0.77) | 0.68(0.73-0.64)      | 0.59(0.63-0.55) | 0.31(0.34-0.29)     |
| 2013 | both   | 1.57(1.67-1.41)                     | 1.36(1.45-1.28) | 0.96(1.05-0.78) | 0.88(0.93-0.84)          | 0.98(1.04-0.93) | 0.92(1.00-0.79)        | 0.79(0.84-0.75) | 0.68(0.73-0.64)      | 0.58(0.63-0.55) | 0.31(0.34-0.29)     |
| 2014 | both   | 1.55(1.66-1.39)                     | 1.37(1.47-1.28) | 0.96(1.05-0.77) | 0.88(0.94-0.84)          | 0.96(1.01-0.91) | 0.91(1.01-0.78)        | 0.79(0.84-0.75) | 0.67(0.72-0.64)      | 0.59(0.64-0.55) | 0.31(0.34-0.29)     |
| 2015 | both   | 1.53(1.63-1.38)                     | 1.39(1.48-1.30) | 0.96(1.05-0.77) | 0.89(0.94-0.84)          | 0.94(0.99-0.89) | 0.91(1.01-0.77)        | 0.79(0.84-0.74) | 0.67(0.71-0.64)      | 0.59(0.64-0.55) | 0.31(0.34-0.29)     |
| 2016 | both   | 1.52(1.63-1.37)                     | 1.40(1.51-1.30) | 0.96(1.06-0.76) | 0.90(0.95-0.85)          | 0.93(0.99-0.88) | 0.91(1.02-0.77)        | 0.79(0.84-0.74) | 0.67(0.72-0.63)      | 0.59(0.65-0.55) | 0.32(0.35-0.29)     |
| 2017 | both   | 1.52(1.64-1.36)                     | 1.42(1.53-1.31) | 0.97(1.06-0.76) | 0.92(0.98-0.86)          | 0.93(1.00-0.87) | 0.91(1.02-0.78)        | 0.80(0.86-0.74) | 0.68(0.73-0.64)      | 0.60(0.66-0.55) | 0.32(0.35-0.29)     |
| 2018 | both   | 1.53(1.66-1.36)                     | 1.44(1.57-1.31) | 0.98(1.08-0.76) | 0.94(1.01-0.88)          | 0.94(1.02-0.87) | 0.91(1.04-0.77)        | 0.82(0.89-0.76) | 0.69(0.75-0.65)      | 0.62(0.68-0.56) | 0.33(0.37-0.30)     |
| 2019 | both   | 1.52(1.65-1.35)                     | 1.45(1.59-1.32) | 0.98(1.09-0.77) | 0.96(1.03-0.88)          | 0.94(1.02-0.87) | 0.92(1.05-0.77)        | 0.83(0.91-0.76) | 0.70(0.76-0.65)      | 0.63(0.70-0.56) | 0.34(0.37-0.30)     |

**Supplementary Table S2. Most common cancer types by country in terms of incidence (A) and deaths (B) among 15–39 year-olds in 2019.**

**A**

| Incidence                          |                             |                       |                                  |                              |                                  |                                       |                                |                                 |                      |                |              |
|------------------------------------|-----------------------------|-----------------------|----------------------------------|------------------------------|----------------------------------|---------------------------------------|--------------------------------|---------------------------------|----------------------|----------------|--------------|
| <u>Cervical cancer</u><br>N=86     |                             |                       | Breast<br>N=77                   |                              | <u>Testicular cancer</u><br>N=12 | Leukemia<br>N=10                      | Malignant skin melanoma<br>N=9 | Non-melanoma skin cancer<br>N=5 | Brain and CNS<br>N=2 | Bladder<br>N=1 | Liver<br>N=1 |
| Fiji                               | Equatorial Guinea           | Palau                 | China                            | Spain                        | Tonga                            | Democratic People's Republic of Korea | Australia                      | Canada                          | Iceland              | Egypt          | Gambia       |
| Kiribati                           | Gabon                       | Saint Kitts and Nevis | Cambodia                         | United Kingdom               | Albania                          | Timor-Leste                           | New Zealand                    | United States of America        | Tajikistan           |                |              |
| Marshall Islands                   | Burundi                     | South Sudan           | Indonesia                        | Antigua and Barbuda          | Croatia                          | Andorra                               | Denmark                        | Brazil                          |                      |                |              |
| Samoa                              | Comoros                     | Belarus               | Lao People's Democratic Republic | Bahamas                      | Czechia                          | Germany                               | Finland                        | Greenland                       |                      |                |              |
| Vanuatu                            | Djibouti                    | Peru                  | Malaysia                         | Barbados                     | Hungary                          | Italy                                 | Ireland                        | Switzerland                     |                      |                |              |
| Kazakhstan                         | Eritrea                     | Bhutan                | Maldives                         | Jamaica                      | Poland                           | Syrian Arab Republic                  | Luxembourg                     |                                 |                      |                |              |
| Kyrgyzstan                         | Ethiopia                    | Nepal                 | Myanmar                          | Trinidad and Tobago          | Serbia                           | Yemen                                 | Netherlands                    |                                 |                      |                |              |
| Mongolia                           | Kenya                       | Malawi                | Philippines                      | Algeria                      | Slovakia                         | San Marino                            | Norway                         |                                 |                      |                |              |
| Romania                            | Madagascar                  |                       | Sri Lanka                        | Bahrain                      | Slovenia                         | Sudan                                 | Sweden                         |                                 |                      |                |              |
| Republic of Moldova                | Mozambique                  |                       | Thailand                         | Iran (Islamic Republic of)   | Austria                          | Afghanistan                           |                                |                                 |                      |                |              |
| Argentina                          | Rwanda                      |                       | Viet Nam                         | Iraq                         | Chile                            |                                       |                                |                                 |                      |                |              |
| Uruguay                            | Somalia                     |                       | Micronesia (Federated States of) | Jordan                       | Monaco                           |                                       |                                |                                 |                      |                |              |
| Belize                             | United Republic of Tanzania |                       | Papua New Guinea                 | Kuwait                       |                                  |                                       |                                |                                 |                      |                |              |
| Cuba                               | Uganda                      |                       | Solomon Islands                  | Lebanon                      |                                  |                                       |                                |                                 |                      |                |              |
| Dominica                           | Zambia                      |                       | Armenia                          | Libya                        |                                  |                                       |                                |                                 |                      |                |              |
| Dominican Republic                 | Botswana                    |                       | Azerbaijan                       | Morocco                      |                                  |                                       |                                |                                 |                      |                |              |
| Grenada                            | Lesotho                     |                       | Georgia                          | Palestine                    |                                  |                                       |                                |                                 |                      |                |              |
| Guyana                             | Namibia                     |                       | Uzbekistan                       | Qatar                        |                                  |                                       |                                |                                 |                      |                |              |
| Haiti                              | South Africa                |                       | Bosnia and Herzegovina           | Tunisia                      |                                  |                                       |                                |                                 |                      |                |              |
| Saint Lucia                        | Eswatini                    |                       | Bulgaria                         | Turkey                       |                                  |                                       |                                |                                 |                      |                |              |
| Saint Vincent and the Grenadines   | Zimbabwe                    |                       | North Macedonia                  | Pakistan                     |                                  |                                       |                                |                                 |                      |                |              |
| Suriname                           | Benin                       |                       | Montenegro                       | Mauritius                    |                                  |                                       |                                |                                 |                      |                |              |
| Bolivia (Plurinational State of)   | Burkina Faso                |                       | Estonia                          | Seychelles                   |                                  |                                       |                                |                                 |                      |                |              |
| Ecuador                            | Cameroon                    |                       | Latvia                           | American Samoa               |                                  |                                       |                                |                                 |                      |                |              |
| Colombia                           | Cabo Verde                  |                       | Lithuania                        | Bermuda                      |                                  |                                       |                                |                                 |                      |                |              |
| Costa Rica                         | Chad                        |                       | Russian Federation               | Cook Islands                 |                                  |                                       |                                |                                 |                      |                |              |
| El Salvador                        | Cote d'Ivoire               |                       | Ukraine                          | Guam                         |                                  |                                       |                                |                                 |                      |                |              |
| Guatemala                          | Ghana                       |                       | Brunei Darussalam                | Nauru                        |                                  |                                       |                                |                                 |                      |                |              |
| Honduras                           | Guinea                      |                       | Japan                            | Niue                         |                                  |                                       |                                |                                 |                      |                |              |
| Mexico                             | Guinea-Bissau               |                       | Republic of Korea                | Northern Mariana Islands     |                                  |                                       |                                |                                 |                      |                |              |
| Nicaragua                          | Liberia                     |                       | Singapore                        | Puerto Rico                  |                                  |                                       |                                |                                 |                      |                |              |
| Panama                             | Mali                        |                       | Belgium                          | Tokelau                      |                                  |                                       |                                |                                 |                      |                |              |
| Venezuela (Bolivarian Republic of) | Mauritania                  |                       | Cyprus                           | Tuvalu                       |                                  |                                       |                                |                                 |                      |                |              |
| Paraguay                           | Niger                       |                       | France                           | United States Virgin Islands |                                  |                                       |                                |                                 |                      |                |              |
| India                              | Nigeria                     |                       | Greece                           | Turkmenistan                 |                                  |                                       |                                |                                 |                      |                |              |
| Angola                             | Sao Tome and Principe       |                       | Israel                           | Oman                         |                                  |                                       |                                |                                 |                      |                |              |
| Central African Republic           | Senegal                     |                       | Malta                            | Saudi Arabia                 |                                  |                                       |                                |                                 |                      |                |              |
| Congo                              | Sierra Leone                |                       | Portugal                         | United Arab Emirates         |                                  |                                       |                                |                                 |                      |                |              |
| Democratic Republic of the Congo   | Togo                        |                       |                                  | Bangladesh                   |                                  |                                       |                                |                                 |                      |                |              |



**Supplementary Table S3. Worldwide proportion of the 29 cancer types by age groups for (A) incidence and (B) deaths among 15–39 year-olds in 2019**

**A**

|                                      | 0 to 14   |               | 15 to 19 |               | 20 to 24 |               | 25 to 29 |               | 30 to 34 |               | 35 to 39 |               | 40 to 44  |               | 45 to 49  |               | 50 to 74   |               | 75 plus    |               |
|--------------------------------------|-----------|---------------|----------|---------------|----------|---------------|----------|---------------|----------|---------------|----------|---------------|-----------|---------------|-----------|---------------|------------|---------------|------------|---------------|
|                                      | cases     | Proportion(%) | cases    | Proportion(%) | cases    | Proportion(%) | cases    | Proportion(%) | cases    | Proportion(%) | cases    | Proportion(%) | cases     | Proportion(%) | cases     | Proportion(%) | cases      | Proportion(%) | cases      | Proportion(%) |
| Esophageal cancer                    | --        | --            | --       | --            | 561.18   | 0.41          | 968.62   | 0.45          | 2105.45  | 0.59          | 4452.56  | 0.85          | 10067.07  | 1.31          | 22664.04  | 1.96          | 348022.00  | 2.62          | 145722.32  | 2.16          |
| Stomach cancer                       | --        | --            | 1314.91  | 1.28          | 3344.97  | 2.42          | 6738.65  | 3.16          | 15313.03 | 4.28          | 22296.38 | 4.27          | 37469.49  | 4.86          | 57843.81  | 5.01          | 742953.63  | 5.60          | 382530.82  | 5.67          |
| Liver cancer                         | 3718.97   | 1.28          | 1195.79  | 1.16          | 1842.13  | 1.33          | 3457.46  | 1.62          | 7267.57  | 2.03          | 11666.84 | 2.24          | 20139.99  | 2.61          | 32729.67  | 2.83          | 319858.32  | 2.41          | 132487.61  | 1.96          |
| Larynx cancer                        | --        | --            | --       | --            | 356.26   | 0.26          | 494.70   | 0.23          | 1003.04  | 0.28          | 2360.32  | 0.45          | 5394.26   | 0.70          | 11940.48  | 1.03          | 151491.43  | 1.14          | 36108.38   | 0.54          |
| Lung cancer                          | 281.46    | 0.10          | 1242.65  | 1.21          | 2178.40  | 1.57          | 4011.38  | 1.88          | 8880.29  | 2.48          | 16287.86 | 3.12          | 32283.78  | 4.19          | 72061.85  | 6.24          | 1438081.51 | 10.84         | 684688.98  | 10.15         |
| Breast cancer                        | --        | --            | 2901.32  | 2.82          | 6528.58  | 4.72          | 19427.93 | 9.10          | 49873.25 | 13.92         | 91128.26 | 17.46         | 155655.99 | 20.20         | 212464.30 | 18.39         | 1147419.11 | 8.65          | 316955.38  | 4.70          |
| Cervical cancer                      | --        | --            | 1360.47  | 1.32          | 5737.32  | 4.14          | 16745.78 | 7.84          | 39556.90 | 11.04         | 55857.98 | 10.70         | 68350.78  | 8.87          | 69292.94  | 6.00          | 263074.27  | 1.98          | 45564.44   | 0.68          |
| Uterine cancer                       | --        | --            | --       | --            | 1121.87  | 0.81          | 2700.94  | 1.26          | 5785.05  | 1.62          | 9807.59  | 1.88          | 15115.03  | 1.96          | 29054.73  | 2.52          | 305222.75  | 2.30          | 66233.15   | 0.98          |
| Prostate cancer                      | --        | --            | --       | --            | 810.37   | 0.59          | 1207.71  | 0.57          | 1509.20  | 0.42          | 1944.42  | 0.37          | 3693.20   | 0.48          | 13416.34  | 1.16          | 884644.71  | 6.67          | 503225.70  | 7.46          |
| <u>Colorectal cancer</u>             | 1045.95   | 0.36          | 2297.95  | 2.23          | 5188.14  | 3.75          | 10548.55 | 4.94          | 22464.39 | 6.27          | 35590.63 | 6.82          | 56655.05  | 7.35          | 92991.29  | 8.05          | 1239836.13 | 9.34          | 699550.20  | 10.37         |
| Lip and oral cavity cancer           | 1085.75   | 0.37          | 1624.73  | 1.58          | 2867.38  | 2.07          | 4461.67  | 2.09          | 7710.08  | 2.15          | 12776.32 | 2.45          | 17900.65  | 2.32          | 27003.33  | 2.34          | 227768.53  | 1.72          | 69899.37   | 1.04          |
| Nasopharynx cancer                   | 1119.89   | 0.38          | 1435.35  | 1.39          | 2024.24  | 1.46          | 3701.83  | 1.73          | 9442.32  | 2.64          | 11958.32 | 2.29          | 17129.33  | 2.22          | 22223.80  | 1.92          | 92671.52   | 0.70          | 14795.18   | 0.22          |
| Other pharynx cancer                 | --        | --            | --       | --            | 799.84   | 0.58          | 1014.47  | 0.48          | 1735.10  | 0.48          | 3553.39  | 0.68          | 7189.80   | 0.93          | 12695.05  | 1.10          | 117499.96  | 0.89          | 22413.62   | 0.33          |
| Gallbladder and biliary tract cancer | --        | --            | --       | --            | 260.33   | 0.19          | 475.52   | 0.22          | 1069.34  | 0.30          | 2035.87  | 0.39          | 3696.90   | 0.48          | 6184.53   | 0.54          | 104910.37  | 0.79          | 80578.53   | 1.19          |
| Pancreatic cancer                    | --        | --            | 235.94   | 0.23          | 478.43   | 0.35          | 1011.18  | 0.47          | 2639.48  | 0.74          | 5036.02  | 0.96          | 9365.12   | 1.22          | 18085.04  | 1.57          | 304383.28  | 2.29          | 189062.26  | 2.80          |
| Malignant skin melanoma              | 1829.41   | 0.63          | 1556.43  | 1.51          | 3640.40  | 2.63          | 7481.38  | 3.50          | 11089.77 | 3.10          | 13497.60 | 2.59          | 16613.61  | 2.16          | 19089.23  | 1.65          | 146864.97  | 1.11          | 68290.32   | 1.01          |
| Non-melanoma skin cancer             | --        | --            | --       | --            | 9511.65  | 6.87          | 17984.26 | 8.42          | 40030.87 | 11.18         | 73191.49 | 14.02         | 127287.14 | 16.52         | 218539.64 | 18.92         | 3524549.92 | 26.56         | 2342591.89 | 34.72         |
| Ovarian cancer                       | 2512.34   | 0.86          | 3210.96  | 3.12          | 5056.60  | 3.65          | 6891.82  | 3.23          | 8448.40  | 2.36          | 12223.71 | 2.34          | 17686.99  | 2.30          | 26153.39  | 2.26          | 162791.30  | 1.23          | 49446.94   | 0.73          |
| Testicular cancer                    | 19053.23  | 6.54          | 3773.74  | 3.66          | 10469.82 | 7.56          | 15200.02 | 7.12          | 15825.06 | 4.42          | 12131.95 | 2.32          | 8958.04   | 1.16          | 6238.56   | 0.54          | 14873.67   | 0.11          | 2788.99    | 0.04          |
| Kidney cancer                        | 12290.89  | 4.22          | 1330.08  | 1.29          | 1951.82  | 1.41          | 3107.37  | 1.46          | 5572.00  | 1.56          | 9174.68  | 1.76          | 14927.89  | 1.94          | 21935.68  | 1.90          | 217064.85  | 1.64          | 84392.17   | 1.25          |
| Bladder cancer                       | 0.00      | 0.00          | 729.99   | 0.71          | 1007.30  | 0.73          | 1651.40  | 0.77          | 3895.22  | 1.09          | 6811.14  | 1.30          | 8953.08   | 1.16          | 15874.11  | 1.37          | 285639.39  | 2.15          | 199742.93  | 2.96          |
| Brain and CNS cancer                 | 39932.68  | 13.71         | 7668.27  | 7.45          | 8729.79  | 6.31          | 12225.79 | 5.73          | 15806.72 | 4.41          | 17080.26 | 3.27          | 18539.73  | 2.41          | 22636.62  | 1.96          | 154620.17  | 1.17          | 50752.35   | 0.75          |
| Thyroid cancer                       | 2356.08   | 0.81          | 2562.49  | 2.49          | 5058.32  | 3.65          | 8566.56  | 4.01          | 13786.21 | 3.85          | 16858.00 | 3.23          | 20856.59  | 2.71          | 23344.29  | 2.02          | 115570.13  | 0.87          | 24887.97   | 0.37          |
| Mesothelioma                         | 0.00      | 0.00          | 0.00     | 0.00          | 192.95   | 0.14          | 307.28   | 0.14          | 346.43   | 0.10          | 619.63   | 0.12          | 903.74    | 0.12          | 1370.26   | 0.12          | 18906.28   | 0.14          | 11864.09   | 0.18          |
| Hodgkin lymphoma                     | 4612.98   | 1.58          | 4957.65  | 4.81          | 7573.80  | 5.47          | 7810.14  | 3.66          | 7170.41  | 2.00          | 5875.84  | 1.13          | 5293.41   | 0.69          | 4893.10   | 0.42          | 26265.41   | 0.20          | 13056.14   | 0.19          |
| Non-Hodgkin lymphoma                 | 14792.67  | 5.08          | 10399.85 | 10.10         | 8343.81  | 6.03          | 9228.97  | 4.32          | 11199.49 | 3.13          | 13254.79 | 2.54          | 12204.51  | 1.58          | 16955.41  | 1.47          | 212597.52  | 1.60          | 148099.52  | 2.20          |
| Multiple myeloma                     | 0.00      | 0.00          | 0.00     | 0.00          | 367.52   | 0.27          | 429.54   | 0.20          | 767.89   | 0.21          | 1365.86  | 0.26          | 2634.93   | 0.34          | 5175.04   | 0.45          | 92171.35   | 0.69          | 52775.53   | 0.78          |
| Leukemia                             | 106082.25 | 36.41         | 18081.45 | 17.56         | 18741.36 | 13.54         | 19135.94 | 8.96          | 20571.50 | 5.74          | 24676.46 | 4.73          | 23480.64  | 3.05          | 30733.49  | 2.66          | 251361.18  | 1.89          | 130714.75  | 1.94          |
| Other malignant neoplasms            | 80604.32  | 27.67         | 35101.22 | 34.09         | 23680.41 | 17.11         | 26538.59 | 12.43         | 27321.40 | 7.63          | 28468.48 | 5.45          | 31979.46  | 4.15          | 41476.20  | 3.59          | 359235.92  | 2.71          | 177040.28  | 2.62          |

**B**

|                                      | 0 to 14  |               | 15 to 19 |               | 20 to 24 |               | 25 to 29 |               | 30 to 34 |               | 35 to 39 |               | 40 to 44 |               | 45 to 49 |               | 50 to 74   |               | 75 plus   |               |
|--------------------------------------|----------|---------------|----------|---------------|----------|---------------|----------|---------------|----------|---------------|----------|---------------|----------|---------------|----------|---------------|------------|---------------|-----------|---------------|
|                                      | cases    | Proportion(%) | cases      | Proportion(%) | cases     | Proportion(%) |
| Esophageal cancer                    | 0.00     | 0.00          | 0.00     | 0.00          | 360.02   | 0.82          | 360.02   | 0.82          | 1606.61  | 1.58          | 3572.50  | 2.26          | 8523.50  | 3.33          | 18217.85 | 4.46          | 308834.32  | 5.75          | 156276.85 | 4.48          |
| Stomach cancer                       | 0.00     | 0.00          | 660.62   | 2.02          | 1762.78  | 4.00          | 1762.78  | 4.00          | 8295.99  | 8.17          | 13594.65 | 8.59          | 23046.81 | 8.99          | 36391.38 | 8.90          | 523201.98  | 9.74          | 346649.72 | 9.94          |
| Liver cancer                         | 3289.71  | 3.33          | 700.96   | 2.14          | 1170.33  | 2.65          | 1170.33  | 2.65          | 5381.83  | 5.30          | 8990.85  | 5.68          | 15843.88 | 6.18          | 26186.07 | 6.40          | 281644.99  | 5.24          | 139039.47 | 3.99          |
| Larynx cancer                        | 0.00     | 0.00          | 0.00     | 0.00          | 153.63   | 0.35          | 153.63   | 0.35          | 536.87   | 0.53          | 1330.47  | 0.84          | 3209.22  | 1.25          | 6374.92  | 1.56          | 82994.62   | 1.54          | 28527.02  | 0.82          |
| Lung cancer                          | 209.28   | 0.21          | 737.83   | 2.25          | 1422.72  | 3.23          | 1422.72  | 3.23          | 6805.49  | 6.70          | 13001.26 | 8.22          | 27254.06 | 10.63         | 58703.73 | 14.36         | 1230685.73 | 22.90         | 701015.31 | 20.10         |
| Breast cancer                        | 0.00     | 0.00          | 715.48   | 2.18          | 1687.88  | 3.83          | 1687.88  | 3.83          | 12131.38 | 11.95         | 24014.29 | 15.18         | 38874.13 | 15.17         | 54486.64 | 13.32         | 381615.89  | 7.10          | 182595.34 | 5.24          |
| Cervical cancer                      | 0.00     | 0.00          | 235.89   | 0.72          | 1141.79  | 2.59          | 1141.79  | 2.59          | 8198.48  | 8.07          | 14141.15 | 8.94          | 21987.15 | 8.58          | 27394.34 | 6.70          | 155771.59  | 2.90          | 48157.96  | 1.38          |
| Uterine cancer                       | 0.00     | 0.00          | 0.00     | 0.00          | 100.50   | 0.23          | 100.50   | 0.23          | 508.12   | 0.50          | 962.34   | 0.61          | 1870.43  | 0.73          | 3442.11  | 0.84          | 54530.45   | 1.01          | 29989.69  | 0.86          |
| Prostate cancer                      | 0.00     | 0.00          | 0.00     | 0.00          | 119.01   | 0.27          | 119.01   | 0.27          | 242.17   | 0.24          | 316.40   | 0.20          | 652.50   | 0.25          | 2045.94  | 0.50          | 175101.87  | 3.26          | 308160.07 | 8.84          |
| Colorectal cancer                    | 468.68   | 0.47          | 786.34   | 2.40          | 1876.30  | 4.25          | 1876.30  | 4.25          | 8583.18  | 8.45          | 13334.51 | 8.43          | 21445.96 | 8.37          | 36747.76 | 8.99          | 530598.42  | 9.87          | 468184.84 | 13.42         |
| Lip and oral cavity cancer           | 336.68   | 0.34          | 446.55   | 1.36          | 851.23   | 1.93          | 851.23   | 1.93          | 2669.09  | 2.63          | 4665.77  | 2.95          | 8240.59  | 3.21          | 12974.49 | 3.17          | 117982.46  | 2.20          | 49820.03  | 1.43          |
| Nasopharynx cancer                   | 437.87   | 0.44          | 404.01   | 1.23          | 591.88   | 1.34          | 591.88   | 1.34          | 1591.39  | 1.57          | 2646.86  | 1.67          | 4550.22  | 1.78          | 6608.03  | 1.62          | 43790.09   | 0.81          | 10145.07  | 0.29          |
| Other pharynx cancer                 | 0.00     | 0.00          | 0.00     | 0.00          | 431.34   | 0.98          | 431.34   | 0.98          | 1094.83  | 1.08          | 2245.14  | 1.42          | 4528.38  | 1.77          | 7955.35  | 1.95          | 77124.53   | 1.44          | 20238.64  | 0.58          |
| Gallbladder and biliary tract cancer | 0.00     | 0.00          | 0.00     | 0.00          | 138.08   | 0.31          | 138.08   | 0.31          | 667.49   | 0.66          | 1310.99  | 0.83          | 2532.56  | 0.99          | 4838.66  | 1.18          | 88080.34   | 1.64          | 74599.19  | 2.14          |
| Pancreatic cancer                    | 0.00     | 0.00          | 143.26   | 0.44          | 322.99   | 0.73          | 322.99   | 0.73          | 2143.98  | 2.11          | 4258.01  | 2.69          | 8396.69  | 3.28          | 15998.60 | 3.91          | 293555.94  | 5.46          | 205547.21 | 5.89          |
| Malignant skin melanoma              | 289.89   | 0.29          | 168.74   | 0.52          | 354.93   | 0.80          | 354.93   | 0.80          | 1215.44  | 1.20          | 1834.56  | 1.16          | 2521.76  | 0.98          | 3110.41  | 0.76          | 30295.51   | 0.56          | 22377.89  | 0.64          |
| Non-melanoma skin cancer             | 0.00     | 0.00          | 0.00     | 0.00          | 164.75   | 0.37          | 164.75   | 0.37          | 435.95   | 0.43          | 621.61   | 0.39          | 932.83   | 0.36          | 1349.53  | 0.33          | 22064.77   | 0.41          | 30240.20  | 0.87          |
| Ovarian cancer                       | 537.67   | 0.54          | 545.89   | 1.67          | 948.48   | 2.15          | 948.48   | 2.15          | 2275.00  | 2.24          | 3738.39  | 2.36          | 6798.74  | 2.65          | 12064.61 | 2.95          | 117800.15  | 2.19          | 52315.18  | 1.50          |
| Testicular cancer                    | 526.68   | 0.53          | 399.72   | 1.22          | 1024.08  | 2.32          | 1024.08  | 2.32          | 1388.68  | 1.37          | 1133.68  | 0.72          | 895.18   | 0.35          | 620.45   | 0.15          | 2193.57    | 0.04          | 1254.15   | 0.04          |
| Kidney cancer                        | 2712.67  | 2.74          | 240.44   | 0.73          | 363.36   | 0.82          | 363.36   | 0.82          | 1028.53  | 1.01          | 1792.55  | 1.13          | 3061.31  | 1.19          | 5880.07  | 1.44          | 89146.94   | 1.66          | 61620.08  | 1.77          |
| Bladder cancer                       | 0.00     | 0.00          | 92.44    | 0.28          | 141.61   | 0.32          | 141.61   | 0.32          | 559.94   | 0.55          | 1021.86  | 0.65          | 2045.33  | 0.80          | 3688.92  | 0.90          | 94952.99   | 1.77          | 125997.47 | 3.61          |
| Brain and CNS cancer                 | 19988.32 | 20.22         | 3549.71  | 10.84         | 3865.84  | 8.76          | 3865.84  | 8.76          | 7336.58  | 7.22          | 9072.98  | 5.74          | 11456.99 | 4.47          | 14783.78 | 3.62          | 126217.45  | 2.35          | 44701.39  | 1.28          |
| Thyroid cancer                       | 198.67   | 0.20          | 200.75   | 0.61          | 430.09   | 0.97          | 430.09   | 0.97          | 685.40   | 0.67          | 926.11   | 0.59          | 1243.09  | 0.48          | 1829.55  | 0.45          | 22890.91   | 0.43          | 16560.86  | 0.47          |
| Mesothelioma                         | 0.00     | 0.00          | 0.00     | 0.00          | 109.68   | 0.25          | 109.68   | 0.25          | 242.85   | 0.24          | 446.73   | 0.28          | 695.34   | 0.27          | 1022.29  | 0.25          | 14863.47   | 0.28          | 11679.74  | 0.33          |
| Hodgkin lymphoma                     | 1728.12  | 1.75          | 1095.86  | 3.35          | 1592.74  | 3.61          | 1592.74  | 3.61          | 1808.83  | 1.78          | 1671.40  | 1.06          | 1604.73  | 0.63          | 1485.75  | 0.36          | 10276.13   | 0.19          | 4363.86   | 0.13          |
| Non-Hodgkin lymphoma                 | 5825.11  | 5.89          | 2826.69  | 8.63          | 3673.12  | 8.33          | 3673.12  | 8.33          | 4674.48  | 4.60          | 5650.44  | 3.57          | 7480.46  | 2.92          | 10173.49 | 2.49          | 121767.60  | 2.27          | 88570.45  | 2.54          |
| Multiple myeloma                     | 0.00     | 0.00          | 0.00     | 0.00          | 181.65   | 0.41          | 181.65   | 0.41          | 449.60   | 0.44          | 825.85   | 0.52          | 1676.54  | 0.65          | 3061.27  | 0.75          | 61180.26   | 1.14          | 45876.02  | 1.32          |
| Leukemia                             | 34371.23 | 34.78         | 8821.97  | 26.94         | 8550.05  | 19.38         | 8550.05  | 19.38         | 9189.95  | 9.05          | 9824.78  | 6.21          | 10897.56 | 4.25          | 13295.21 | 3.25          | 132693.65  | 2.47          | 98228.97  | 2.82          |
| Other malignant neoplasms            | 27913.56 | 28.24         | 9972.81  | 30.46         | 10581.77 | 23.99         | 10581.77 | 23.99         | 9809.82  | 9.66          | 11225.91 | 7.10          | 14057.71 | 5.48          | 18178.08 | 4.45          | 181815.03  | 3.38          | 114749.52 | 3.29          |

**Supplementary Table S4. Incidence and deaths in the different SDI quintiles among 15–39 year-olds from 1990 to 2019**

| Year | Gender | Incidence rate (per 100,000) No. (95% UI) |                    |                    |                    |                    | Death rate (per 100,000) No. (95% UI) |                    |                    |                    |                    |
|------|--------|-------------------------------------------|--------------------|--------------------|--------------------|--------------------|---------------------------------------|--------------------|--------------------|--------------------|--------------------|
|      |        | High SDI                                  | High-middle SDI    | Middle SDI         | Low-middle SDI     | Low SDI            | High SDI                              | High-middle SDI    | Middle SDI         | Low-middle SDI     | Low SDI            |
| 1990 | both   | 77.05(83.41-71.83)                        | 43.43(46.02-41.04) | 30.90(33.35-28.73) | 24.07(26.32-21.95) | 21.69(24.78-18.80) | 14.48(14.67-14.15)                    | 18.77(20.13-17.46) | 16.94(18.29-15.72) | 13.71(14.93-12.57) | 12.36(13.92-10.72) |
| 1991 | both   | 78.25(84.62-73.04)                        | 44.26(46.54-41.97) | 30.54(32.54-28.73) | 24.07(26.20-22.10) | 21.75(24.67-18.83) | 14.37(14.56-14.03)                    | 18.88(20.17-17.64) | 16.91(18.15-15.72) | 13.64(14.80-12.49) | 12.37(14.02-10.72) |
| 1992 | both   | 79.27(85.78-74.02)                        | 44.88(46.86-42.88) | 30.84(32.73-29.01) | 24.22(26.28-22.33) | 21.78(24.82-18.86) | 14.20(14.39-13.86)                    | 19.00(20.23-17.86) | 16.94(18.15-15.83) | 13.69(14.85-12.61) | 12.39(13.97-10.77) |
| 1993 | both   | 81.07(87.57-75.85)                        | 45.84(47.88-43.85) | 31.01(32.83-29.28) | 24.39(26.58-22.41) | 21.78(24.74-18.94) | 14.13(14.33-13.80)                    | 19.27(20.39-18.16) | 16.82(17.97-15.68) | 13.71(14.80-12.67) | 12.39(13.97-10.86) |
| 1994 | both   | 81.92(88.43-76.70)                        | 46.91(48.80-44.97) | 31.87(33.55-30.14) | 24.73(26.85-22.79) | 21.76(24.64-19.00) | 14.01(14.20-13.68)                    | 19.68(20.70-18.67) | 17.12(18.23-16.05) | 13.85(14.95-12.84) | 12.39(13.92-10.90) |
| 1995 | both   | 82.67(89.21-77.47)                        | 47.52(49.55-45.48) | 32.62(34.33-30.79) | 24.99(27.11-23.19) | 21.70(24.69-18.89) | 13.87(14.06-13.57)                    | 19.76(20.76-18.78) | 17.33(18.33-16.32) | 13.94(15.06-12.90) | 12.35(13.89-10.89) |
| 1996 | both   | 82.50(89.05-77.35)                        | 47.40(49.41-45.48) | 33.13(34.84-31.40) | 25.16(27.23-23.31) | 21.64(24.41-18.98) | 13.65(13.83-13.35)                    | 19.36(20.33-18.36) | 17.31(18.26-16.36) | 13.95(15.00-12.96) | 12.29(13.79-10.82) |
| 1997 | both   | 82.29(88.67-77.32)                        | 47.49(49.27-45.30) | 33.60(35.28-31.87) | 25.77(27.83-23.87) | 21.71(24.46-19.13) | 13.46(13.64-13.16)                    | 18.93(19.89-17.87) | 17.29(18.23-16.39) | 14.23(15.36-13.20) | 12.31(13.77-10.82) |
| 1998 | both   | 81.64(87.64-76.83)                        | 48.11(49.98-46.13) | 34.45(36.22-32.70) | 26.25(28.59-24.32) | 21.88(24.61-19.22) | 13.20(13.38-12.91)                    | 18.77(19.74-17.76) | 17.52(18.54-16.56) | 14.46(15.57-13.45) | 12.37(13.81-10.93) |
| 1999 | both   | 81.23(87.07-76.57)                        | 49.09(51.20-46.98) | 35.11(37.07-33.22) | 26.67(28.83-24.65) | 22.01(24.73-19.32) | 12.95(13.12-12.66)                    | 18.84(19.83-17.93) | 17.71(18.69-16.80) | 14.66(15.78-13.62) | 12.41(13.87-11.05) |
| 2000 | both   | 80.94(86.47-76.39)                        | 49.61(51.68-47.34) | 35.78(37.84-33.97) | 27.03(29.26-24.86) | 22.03(24.76-19.43) | 12.76(12.92-12.46)                    | 18.71(19.68-17.79) | 17.80(18.75-16.87) | 14.78(15.90-13.70) | 12.40(13.86-11.04) |
| 2001 | both   | 81.95(87.75-77.54)                        | 49.54(51.59-47.54) | 36.07(38.03-34.13) | 27.15(29.33-25.13) | 22.03(24.75-19.57) | 12.53(12.70-12.24)                    | 18.21(19.17-17.31) | 17.59(18.62-16.70) | 14.71(15.83-13.67) | 12.34(13.70-10.97) |
| 2002 | both   | 84.56(90.30-79.87)                        | 48.67(50.71-46.67) | 35.56(37.35-33.80) | 26.92(28.93-25.04) | 21.97(24.68-19.58) | 12.22(12.39-11.94)                    | 17.34(18.13-16.56) | 17.00(17.86-16.13) | 14.47(15.52-13.46) | 12.25(13.61-10.98) |
| 2003 | both   | 87.67(93.77-82.85)                        | 48.35(50.06-46.50) | 34.93(36.61-33.20) | 26.20(28.18-24.51) | 22.03(24.60-19.65) | 11.96(12.13-11.72)                    | 16.65(17.37-15.96) | 16.43(17.24-15.64) | 13.99(14.96-13.08) | 12.26(13.51-10.98) |
| 2004 | both   | 89.55(95.37-84.65)                        | 48.74(50.62-47.01) | 34.78(36.44-33.24) | 26.04(27.97-24.45) | 22.14(24.66-19.79) | 11.69(11.85-11.43)                    | 16.29(16.98-15.61) | 16.03(16.80-15.29) | 13.80(14.75-12.92) | 12.26(13.47-11.03) |
| 2005 | both   | 90.25(96.40-85.25)                        | 49.39(51.16-47.69) | 34.48(36.15-32.95) | 26.33(28.27-24.61) | 22.18(24.59-19.85) | 11.48(11.65-11.21)                    | 16.01(16.63-15.42) | 15.54(16.28-14.84) | 13.82(14.76-12.88) | 12.23(13.45-10.94) |
| 2006 | both   | 89.85(95.90-84.92)                        | 49.34(51.03-47.79) | 34.13(35.65-32.62) | 26.53(28.57-24.90) | 22.11(24.46-19.77) | 11.28(11.44-11.02)                    | 15.51(16.05-14.95) | 15.03(15.72-14.38) | 13.81(14.74-12.93) | 12.17(13.31-11.04) |
| 2007 | both   | 90.01(96.03-85.08)                        | 50.20(51.84-48.54) | 34.08(35.62-32.72) | 26.44(28.40-24.83) | 22.05(24.49-19.79) | 11.11(11.27-10.85)                    | 15.24(15.80-14.68) | 14.66(15.38-14.01) | 13.67(14.65-12.82) | 12.10(13.28-10.93) |
| 2008 | both   | 90.67(96.64-85.67)                        | 51.36(53.09-49.60) | 34.59(36.15-33.11) | 26.55(28.43-24.92) | 22.12(24.58-19.78) | 10.99(11.17-10.73)                    | 15.09(15.65-14.56) | 14.59(15.30-13.98) | 13.64(14.59-12.78) | 12.14(13.37-10.93) |
| 2009 | both   | 91.08(96.86-85.97)                        | 52.54(54.48-50.70) | 35.29(36.90-33.73) | 26.62(28.47-24.91) | 22.17(24.54-19.67) | 10.87(11.06-10.62)                    | 14.90(15.42-14.38) | 14.54(15.20-13.97) | 13.53(14.47-12.73) | 12.09(13.33-10.86) |
| 2010 | both   | 90.42(96.04-85.41)                        | 53.42(55.58-51.40) | 35.80(37.51-34.06) | 26.99(29.01-25.34) | 22.25(24.87-19.80) | 10.65(10.83-10.38)                    | 14.73(15.29-14.19) | 14.38(15.10-13.71) | 13.58(14.46-12.76) | 12.07(13.34-10.84) |
| 2011 | both   | 89.80(95.41-84.77)                        | 53.11(55.21-51.07) | 35.79(37.58-34.18) | 27.13(29.10-25.45) | 22.30(24.86-19.87) | 10.46(10.65-10.21)                    | 14.29(14.84-13.80) | 14.06(14.75-13.44) | 13.53(14.47-12.69) | 12.04(13.32-10.78) |
| 2012 | both   | 88.55(94.11-83.55)                        | 52.86(55.06-50.80) | 35.67(37.53-34.10) | 26.90(28.76-25.18) | 22.28(24.91-19.82) | 10.19(10.40-9.94)                     | 13.93(14.43-13.42) | 13.76(14.38-13.15) | 13.26(14.16-12.42) | 11.95(13.24-10.66) |
| 2013 | both   | 88.51(94.14-83.41)                        | 53.67(55.67-51.55) | 35.93(37.70-34.24) | 27.08(29.06-25.28) | 22.46(25.31-19.85) | 10.07(10.31-9.80)                     | 13.89(14.40-13.37) | 13.69(14.36-13.06) | 13.23(14.18-12.38) | 11.97(13.33-10.62) |
| 2014 | both   | 89.07(94.97-83.94)                        | 55.02(57.24-52.82) | 36.28(38.10-34.52) | 27.17(29.24-25.42) | 22.42(25.00-19.74) | 10.07(10.34-9.81)                     | 13.99(14.57-13.39) | 13.63(14.28-12.94) | 13.16(14.07-12.27) | 11.89(13.33-10.48) |
| 2015 | both   | 89.97(95.88-84.65)                        | 56.24(58.86-53.60) | 36.41(38.39-34.39) | 27.31(29.49-25.43) | 22.44(25.25-19.79) | 10.09(10.37-9.85)                     | 14.13(14.74-13.50) | 13.52(14.26-12.84) | 13.13(14.12-12.18) | 11.86(13.35-10.50) |
| 2016 | both   | 91.31(97.53-85.87)                        | 56.89(59.84-53.94) | 36.89(39.05-34.81) | 27.55(30.06-25.34) | 22.54(25.41-19.90) | 10.19(10.51-9.92)                     | 14.16(14.92-13.50) | 13.56(14.35-12.81) | 13.18(14.18-12.20) | 11.86(13.34-10.43) |
| 2017 | both   | 91.73(98.88-85.21)                        | 58.48(62.12-55.13) | 38.15(40.70-35.69) | 28.01(30.57-25.64) | 22.73(25.68-19.82) | 10.19(10.54-9.89)                     | 14.31(15.14-13.54) | 13.73(14.65-12.83) | 13.29(14.46-12.19) | 11.90(13.50-10.33) |
| 2018 | both   | 91.79(99.61-84.34)                        | 60.62(64.83-56.49) | 39.79(42.77-36.98) | 29.01(31.69-26.38) | 23.11(26.37-19.84) | 10.14(10.53-9.79)                     | 14.65(15.60-13.76) | 14.03(15.10-12.95) | 13.59(14.89-12.44) | 12.00(13.60-10.50) |
| 2019 | both   | 91.81(100.22-83.47)                       | 62.15(67.62-57.07) | 40.83(44.29-37.63) | 29.61(32.53-26.78) | 23.21(26.47-20.01) | 10.10(10.52-9.74)                     | 14.89(15.97-13.81) | 14.16(15.32-13.09) | 13.72(15.07-12.47) | 11.97(13.65-10.42) |

SDI, socio-demographic index.

**Supplementary Table S5. Incident rates (A) and death rates (B) among 15-39 year-olds in different regions from 1990 to 2019.**

**A**

| Year | Gender | Incidence rate (per 100,000) NO. 95% UI |                    |                        |                        |                           |                          |                    |                    |                       |                    |
|------|--------|-----------------------------------------|--------------------|------------------------|------------------------|---------------------------|--------------------------|--------------------|--------------------|-----------------------|--------------------|
|      |        | Western Sub-Saharan Africa              |                    | Tropical Latin America | Southern Latin America | High-income North America | High-income Asia Pacific | Eastern Europe     | East Asia          | Central Latin America | Central Europe     |
|      |        |                                         |                    |                        |                        |                           |                          |                    |                    |                       |                    |
| 1990 | both   | 16.34(19.54-13.47)                      | 68.07(70.50-64.32) | 36.84(39.59-34.87)     | 48.58(51.18-46.07)     | 116.25(132.07-104.05)     | 45.81(47.74-43.73)       | 51.69(53.52-49.19) | 36.10(40.98-31.76) | 32.54(34.34-31.08)    | 55.11(57.04-53.28) |
| 1991 | both   | 16.45(19.47-13.71)                      | 70.41(72.97-66.80) | 36.52(39.06-34.58)     | 48.50(51.11-45.81)     | 117.89(134.03-105.54)     | 45.76(47.78-43.68)       | 53.50(55.22-51.16) | 36.51(40.65-32.41) | 32.73(34.61-31.30)    | 55.49(57.40-53.55) |
| 1992 | both   | 16.60(19.78-13.82)                      | 71.76(74.34-68.26) | 36.67(39.01-34.92)     | 49.17(51.85-46.49)     | 119.47(135.92-106.86)     | 45.92(47.84-43.93)       | 56.16(57.71-54.11) | 36.58(40.57-33.19) | 33.05(34.89-31.57)    | 55.32(57.42-53.23) |
| 1993 | both   | 16.68(20.04-13.80)                      | 73.53(76.27-69.97) | 37.28(39.56-35.57)     | 49.65(52.49-47.01)     | 122.24(138.63-109.38)     | 46.26(48.19-44.17)       | 60.99(62.65-59.23) | 36.75(40.26-33.36) | 33.83(35.65-32.33)    | 54.52(56.50-52.46) |
| 1994 | both   | 16.67(19.97-13.82)                      | 74.60(77.25-71.18) | 37.60(39.83-35.96)     | 50.28(53.30-47.62)     | 123.30(139.85-110.44)     | 46.67(48.61-44.64)       | 62.82(64.56-60.93) | 38.23(41.50-34.95) | 34.85(36.68-33.40)    | 54.43(56.37-52.52) |
| 1995 | both   | 16.62(20.19-13.59)                      | 75.85(78.52-72.43) | 38.16(40.30-36.53)     | 50.59(53.63-47.91)     | 123.68(140.01-110.99)     | 47.66(49.67-45.59)       | 61.16(62.88-59.37) | 39.96(43.57-36.38) | 35.26(37.11-33.70)    | 54.53(56.34-52.75) |
| 1996 | both   | 16.60(20.31-13.92)                      | 76.71(79.23-73.19) | 38.82(40.82-37.24)     | 51.28(54.45-48.53)     | 122.20(137.91-109.59)     | 47.93(49.97-45.77)       | 57.31(58.75-55.63) | 41.12(44.44-37.80) | 35.55(37.33-34.07)    | 53.66(55.40-51.84) |
| 1997 | both   | 16.71(20.09-13.77)                      | 78.49(81.10-74.84) | 39.28(41.20-37.66)     | 51.42(54.86-48.57)     | 119.84(135.26-107.83)     | 48.89(50.99-46.59)       | 53.30(54.81-51.45) | 42.23(45.50-38.89) | 35.82(37.56-34.37)    | 53.73(55.49-52.00) |
| 1998 | both   | 16.81(20.47-13.82)                      | 80.08(82.76-76.33) | 39.79(41.62-38.28)     | 51.47(54.96-48.60)     | 115.97(130.36-104.74)     | 50.59(52.86-47.98)       | 51.39(52.96-49.50) | 44.14(47.43-40.95) | 36.17(37.96-34.69)    | 52.69(54.46-51.00) |
| 1999 | both   | 16.82(20.29-13.61)                      | 81.58(84.25-77.84) | 40.22(42.02-38.59)     | 51.63(55.26-48.58)     | 113.11(126.50-102.31)     | 51.15(53.46-48.30)       | 53.25(54.69-51.63) | 45.39(48.91-42.17) | 36.29(38.11-34.77)    | 52.52(54.25-50.84) |
| 2000 | both   | 16.77(20.20-13.61)                      | 82.36(85.07-78.87) | 40.35(42.10-38.80)     | 50.58(54.34-47.59)     | 111.97(125.24-101.30)     | 50.99(53.31-48.03)       | 53.46(54.89-51.94) | 46.83(50.76-43.22) | 36.17(38.00-34.63)    | 51.81(53.59-50.17) |
| 2001 | both   | 17.01(20.61-13.83)                      | 82.78(85.57-79.20) | 40.58(42.29-38.98)     | 51.15(55.01-47.86)     | 115.28(128.84-104.74)     | 50.68(53.03-47.65)       | 52.28(53.69-50.78) | 47.44(51.37-44.04) | 36.30(38.13-34.78)    | 51.62(53.26-49.95) |
| 2002 | both   | 17.00(20.83-13.75)                      | 83.79(86.71-80.13) | 40.87(42.57-39.30)     | 50.15(54.06-46.91)     | 122.07(135.98-111.25)     | 51.55(54.00-48.25)       | 51.78(53.26-50.40) | 45.72(49.22-42.30) | 36.82(38.68-35.25)    | 51.76(53.51-50.00) |
| 2003 | both   | 17.01(20.92-13.66)                      | 84.85(87.96-81.03) | 41.08(42.76-39.39)     | 49.88(53.84-46.69)     | 129.16(143.75-117.59)     | 53.80(56.20-50.22)       | 52.35(54.18-51.04) | 44.33(47.35-41.37) | 36.93(38.81-35.34)    | 52.55(54.41-50.68) |
| 2004 | both   | 17.05(20.84-13.93)                      | 84.17(87.23-80.24) | 41.45(43.13-39.82)     | 49.53(53.63-46.26)     | 133.91(148.62-121.65)     | 55.67(58.21-51.54)       | 53.28(55.42-52.00) | 44.71(47.89-41.93) | 36.69(38.56-35.06)    | 52.92(54.72-51.04) |
| 2005 | both   | 17.07(21.03-13.70)                      | 83.84(86.96-79.67) | 41.39(43.05-39.75)     | 49.53(53.61-46.27)     | 135.75(150.64-122.95)     | 56.73(59.25-52.36)       | 56.31(58.93-54.64) | 44.42(47.63-41.33) | 37.08(39.00-35.47)    | 53.88(55.77-51.97) |
| 2006 | both   | 16.97(20.99-13.49)                      | 83.25(86.21-79.01) | 41.89(43.72-40.18)     | 50.07(54.36-46.77)     | 134.98(149.78-122.18)     | 57.14(59.76-52.28)       | 55.33(57.99-53.96) | 44.04(47.02-41.20) | 37.54(39.51-35.88)    | 54.29(56.25-52.38) |
| 2007 | both   | 16.97(20.87-13.50)                      | 83.90(86.90-79.68) | 42.33(44.09-40.63)     | 52.06(56.22-48.73)     | 133.80(148.63-121.09)     | 59.16(61.85-53.56)       | 56.25(59.00-54.89) | 44.55(47.60-41.91) | 37.51(39.45-35.92)    | 55.61(57.77-53.60) |
| 2008 | both   | 16.87(20.75-13.44)                      | 84.65(87.77-80.24) | 42.80(44.61-40.98)     | 52.04(56.32-48.59)     | 133.48(147.98-120.94)     | 61.51(64.17-55.64)       | 58.84(61.62-57.30) | 45.84(48.91-43.05) | 38.53(40.54-36.92)    | 56.70(58.98-54.60) |
| 2009 | both   | 17.05(20.93-13.80)                      | 84.84(88.08-80.54) | 43.54(45.41-41.75)     | 54.24(58.93-50.51)     | 133.78(147.94-121.38)     | 62.89(65.69-56.82)       | 58.24(60.37-56.93) | 47.78(51.01-44.52) | 39.50(41.55-37.76)    | 57.99(60.37-55.61) |
| 2010 | both   | 17.31(21.46-13.87)                      | 83.62(86.97-78.96) | 43.96(45.90-42.24)     | 54.24(59.23-50.51)     | 132.51(146.69-120.30)     | 63.03(65.81-56.85)       | 60.17(62.28-58.84) | 49.25(53.36-45.50) | 39.60(41.61-37.90)    | 58.29(60.80-55.86) |
| 2011 | both   | 17.74(21.98-14.12)                      | 82.60(86.09-77.99) | 44.74(46.74-42.90)     | 55.03(60.22-51.18)     | 131.84(145.91-119.58)     | 62.53(65.40-56.34)       | 59.35(61.20-57.92) | 48.96(52.95-45.48) | 39.55(41.56-37.85)    | 58.78(61.38-56.25) |
| 2012 | both   | 17.99(21.92-14.52)                      | 80.86(84.36-76.48) | 45.32(47.38-43.61)     | 56.12(61.37-52.23)     | 131.22(145.22-119.03)     | 59.80(62.55-53.93)       | 60.71(62.56-59.18) | 48.27(52.12-44.64) | 39.78(41.80-38.03)    | 59.73(62.49-57.01) |
| 2013 | both   | 18.17(22.58-14.63)                      | 80.62(84.13-76.06) | 45.91(48.14-43.94)     | 56.93(61.98-52.95)     | 131.13(145.41-118.74)     | 58.46(61.24-53.04)       | 63.95(65.97-62.43) | 48.90(52.88-45.04) | 40.71(42.76-38.97)    | 60.25(63.14-57.42) |
| 2014 | both   | 18.26(22.42-14.78)                      | 79.92(83.64-75.19) | 46.16(48.52-44.21)     | 56.60(61.77-52.58)     | 131.98(146.48-119.48)     | 57.72(60.36-52.54)       | 67.47(69.73-65.75) | 50.84(55.12-46.98) | 42.54(44.64-40.65)    | 61.93(65.02-58.69) |
| 2015 | both   | 18.07(22.23-14.24)                      | 80.92(84.50-76.25) | 46.69(49.22-44.56)     | 58.17(63.51-53.82)     | 133.52(148.83-120.73)     | 55.96(58.71-51.13)       | 72.25(74.87-70.49) | 51.45(56.45-46.45) | 42.97(45.46-40.53)    | 63.42(66.63-60.29) |
| 2016 | both   | 18.25(22.77-14.49)                      | 80.79(84.48-76.12) | 47.76(50.45-45.42)     | 60.19(65.62-55.60)     | 136.21(152.29-122.61)     | 55.45(58.28-50.60)       | 71.68(74.27-69.74) | 52.49(57.91-47.07) | 43.43(46.42-40.62)    | 63.84(67.45-60.47) |
| 2017 | both   | 18.32(22.56-14.52)                      | 81.39(88.53-74.94) | 47.56(50.54-45.07)     | 61.28(70.61-53.02)     | 136.03(152.04-122.22)     | 54.47(57.68-49.75)       | 71.21(74.19-68.50) | 55.84(62.39-49.47) | 44.42(48.34-40.54)    | 64.68(69.64-60.33) |
| 2018 | both   | 18.30(22.97-14.49)                      | 82.37(92.63-73.33) | 48.22(51.49-45.37)     | 62.13(75.29-50.59)     | 134.02(150.54-119.24)     | 54.88(59.97-49.37)       | 72.56(79.14-66.56) | 59.29(66.66-52.15) | 45.02(50.76-39.47)    | 65.65(73.45-58.81) |
| 2019 | both   | 18.21(22.72-14.44)                      | 82.45(93.23-72.56) | 48.74(52.33-45.59)     | 62.88(79.84-48.89)     | 132.52(149.66-115.94)     | 55.31(62.07-48.79)       | 73.85(83.76-65.20) | 61.86(70.67-53.40) | 44.37(51.44-38.10)    | 66.39(75.64-57.95) |



**Supplementary Table S5 (continued). Incident rates (A) and death rates (B) among 15-39 year-olds in different regions from 1990 to 2019.**

**A (continued)**

| Year | Gender | Incidence rate (per 100,000) NO. 95% UI |                    |                     |                    |                      |                             |                    |                    |                    |                            |                            |                              |
|------|--------|-----------------------------------------|--------------------|---------------------|--------------------|----------------------|-----------------------------|--------------------|--------------------|--------------------|----------------------------|----------------------------|------------------------------|
|      |        | Central Asia                            |                    | Caribbean           | Australasia        | Andean Latin America | Southern Sub-Saharan Africa |                    | South Asia         | Oceania            | Eastern Sub-Saharan Africa | Central Sub-Saharan Africa | North Africa and Middle East |
|      |        |                                         |                    |                     |                    |                      |                             |                    |                    |                    |                            |                            |                              |
| 1990 | both   | 41.74(43.56-39.90)                      | 36.35(39.33-32.60) | 77.18(82.55-71.43)  | 31.28(34.67-28.27) | 34.11(38.49-30.72)   | 28.77(32.23-24.98)          | 21.10(23.26-18.91) | 29.96(35.51-24.89) | 23.98(28.40-19.97) | 20.88(26.15-16.08)         | 23.59(25.89-21.48)         |                              |
| 1991 | both   | 42.65(44.36-40.94)                      | 36.87(39.85-33.23) | 77.83(83.21-72.11)  | 30.81(34.09-27.95) | 33.99(38.52-30.67)   | 29.18(32.53-25.61)          | 21.03(23.05-18.94) | 30.28(35.85-24.90) | 24.04(28.34-19.96) | 21.11(26.19-16.29)         | 23.69(25.90-21.59)         |                              |
| 1992 | both   | 44.86(46.83-42.92)                      | 37.82(40.83-34.20) | 78.95(84.63-73.34)  | 32.17(35.89-28.94) | 36.25(40.86-32.91)   | 29.51(33.00-25.83)          | 21.10(23.12-19.06) | 30.50(36.05-25.07) | 24.06(28.29-19.93) | 20.95(26.26-16.31)         | 23.90(26.13-21.85)         |                              |
| 1993 | both   | 46.23(48.52-44.15)                      | 38.75(41.77-35.04) | 79.68(85.34-73.75)  | 32.57(35.95-29.60) | 32.83(36.58-29.41)   | 30.00(33.37-26.40)          | 21.23(23.18-19.26) | 30.39(36.41-24.83) | 24.05(28.10-20.05) | 20.70(25.77-16.12)         | 24.17(26.35-22.11)         |                              |
| 1994 | both   | 47.53(49.91-45.37)                      | 38.55(41.42-35.02) | 82.12(88.34-76.09)  | 33.55(37.39-30.51) | 33.26(37.07-30.09)   | 30.53(33.83-26.80)          | 21.50(23.54-19.55) | 30.35(36.76-24.71) | 23.99(28.18-20.11) | 20.50(25.42-16.01)         | 24.32(26.57-22.20)         |                              |
| 1995 | both   | 46.55(48.66-44.63)                      | 39.51(42.45-36.00) | 84.26(90.86-78.17)  | 33.87(37.57-30.67) | 30.84(34.98-27.54)   | 31.38(34.83-27.58)          | 21.58(23.43-19.58) | 30.56(36.82-24.69) | 23.80(27.67-19.98) | 20.50(25.25-16.16)         | 24.52(26.71-22.49)         |                              |
| 1996 | both   | 45.99(48.00-44.16)                      | 39.75(42.69-36.33) | 85.96(92.55-79.78)  | 33.63(36.48-30.98) | 27.68(32.11-24.26)   | 32.29(35.93-28.47)          | 21.62(23.32-19.77) | 31.12(37.59-25.26) | 23.67(27.51-19.88) | 20.45(25.27-16.32)         | 24.80(27.07-22.73)         |                              |
| 1997 | both   | 45.25(47.33-43.42)                      | 40.26(43.08-36.83) | 88.95(95.90-82.24)  | 34.40(37.36-31.60) | 29.58(33.77-26.03)   | 32.33(35.99-28.47)          | 22.34(24.29-20.53) | 31.32(37.87-24.81) | 23.57(27.34-19.79) | 19.76(24.22-15.74)         | 24.88(27.08-22.88)         |                              |
| 1998 | both   | 44.29(46.21-42.52)                      | 41.21(44.00-37.97) | 91.70(99.50-84.74)  | 35.23(38.80-32.31) | 30.24(35.04-26.43)   | 32.65(36.60-28.66)          | 22.88(24.94-20.86) | 31.71(38.45-25.32) | 23.61(27.27-20.02) | 19.87(24.44-15.91)         | 24.86(26.99-22.91)         |                              |
| 1999 | both   | 43.29(45.06-41.54)                      | 41.58(44.46-38.45) | 92.78(101.31-86.19) | 34.91(38.78-31.64) | 31.77(36.90-27.62)   | 33.21(36.84-29.29)          | 23.43(25.44-21.56) | 32.30(39.47-25.62) | 23.34(26.94-19.94) | 20.20(24.54-16.35)         | 25.13(27.26-23.20)         |                              |
| 2000 | both   | 42.87(44.67-41.25)                      | 42.01(44.83-39.05) | 91.80(99.63-84.96)  | 35.39(39.56-31.81) | 35.60(41.84-30.88)   | 33.41(36.93-29.70)          | 23.80(26.01-21.68) | 32.38(39.65-25.72) | 22.92(26.33-19.51) | 20.13(24.33-16.47)         | 25.36(27.32-23.47)         |                              |
| 2001 | both   | 42.00(43.80-40.47)                      | 42.43(45.44-39.30) | 88.41(96.72-81.98)  | 35.01(38.97-31.40) | 36.11(43.42-30.85)   | 33.49(36.95-29.82)          | 23.87(26.04-21.91) | 32.60(40.22-25.69) | 22.37(25.54-19.27) | 19.91(23.87-16.20)         | 25.59(27.58-23.69)         |                              |
| 2002 | both   | 40.91(42.68-39.38)                      | 41.91(44.90-38.66) | 87.93(96.48-81.73)  | 36.72(40.79-32.82) | 38.17(46.71-32.21)   | 33.92(37.25-30.40)          | 23.66(25.68-21.77) | 32.97(41.04-26.02) | 22.19(25.35-19.26) | 19.76(23.92-16.16)         | 25.42(27.50-23.44)         |                              |
| 2003 | both   | 39.82(41.61-38.29)                      | 42.36(45.44-38.93) | 87.41(96.46-81.22)  | 37.75(41.90-33.71) | 39.84(49.54-32.83)   | 34.19(37.60-30.74)          | 22.91(24.81-21.17) | 32.91(41.16-26.20) | 22.24(25.19-19.39) | 20.08(24.08-16.36)         | 25.45(27.52-23.44)         |                              |
| 2004 | both   | 39.18(41.17-37.69)                      | 42.03(45.33-38.43) | 88.07(95.44-81.52)  | 37.18(41.50-33.33) | 40.21(50.68-32.53)   | 33.71(36.94-30.27)          | 22.86(24.66-21.14) | 32.95(41.23-26.20) | 22.31(25.34-19.55) | 20.01(24.16-16.33)         | 25.80(27.93-23.76)         |                              |
| 2005 | both   | 39.78(41.97-38.17)                      | 42.06(45.64-38.08) | 86.02(93.28-79.58)  | 37.30(41.45-33.55) | 39.17(49.32-31.91)   | 33.35(36.64-30.12)          | 23.38(25.24-21.60) | 33.38(42.03-26.41) | 22.30(25.42-19.48) | 19.83(23.95-16.14)         | 26.37(28.48-24.36)         |                              |
| 2006 | both   | 39.67(41.99-37.87)                      | 41.79(46.20-37.48) | 85.68(92.56-79.33)  | 36.86(40.77-32.99) | 38.65(49.87-31.06)   | 33.02(36.20-29.93)          | 23.73(25.54-22.08) | 33.39(41.90-26.35) | 22.15(25.13-19.38) | 19.69(23.86-15.88)         | 26.86(29.00-24.85)         |                              |
| 2007 | both   | 39.66(41.96-37.82)                      | 41.33(45.80-36.92) | 89.01(96.08-82.19)  | 36.54(40.10-32.89) | 36.62(46.94-29.17)   | 32.88(35.84-29.82)          | 23.79(25.71-22.01) | 33.74(42.05-26.69) | 22.06(25.00-19.18) | 19.37(23.65-15.70)         | 27.18(29.32-25.07)         |                              |
| 2008 | both   | 39.41(41.58-37.68)                      | 41.16(46.20-36.64) | 90.50(98.46-83.61)  | 37.61(41.31-34.10) | 36.20(46.61-28.59)   | 32.99(35.92-29.95)          | 24.15(26.09-22.36) | 33.43(41.88-26.47) | 21.93(24.95-19.03) | 19.31(23.61-15.66)         | 27.67(29.89-25.48)         |                              |
| 2009 | both   | 38.71(40.52-37.29)                      | 40.29(45.24-35.63) | 91.56(99.50-84.78)  | 39.72(43.63-36.04) | 34.65(44.13-26.95)   | 33.07(36.10-30.15)          | 24.27(26.04-22.53) | 32.97(41.36-25.75) | 21.92(25.06-18.96) | 19.29(23.57-15.58)         | 28.38(30.73-26.14)         |                              |
| 2010 | both   | 38.69(40.42-37.32)                      | 39.33(43.92-34.94) | 90.28(98.28-83.57)  | 40.23(44.87-35.44) | 32.57(41.51-25.20)   | 33.06(36.04-29.82)          | 24.73(26.78-23.00) | 33.96(42.46-27.02) | 22.04(25.34-18.83) | 19.37(23.74-15.62)         | 29.24(31.73-26.99)         |                              |
| 2011 | both   | 39.06(40.70-37.64)                      | 39.81(44.35-35.34) | 89.16(97.24-82.29)  | 40.32(45.61-34.89) | 30.26(38.72-23.37)   | 33.09(36.39-29.93)          | 24.84(26.71-22.91) | 34.56(43.03-27.46) | 22.13(25.61-18.98) | 19.49(23.89-15.57)         | 30.03(32.60-27.74)         |                              |
| 2012 | both   | 39.48(41.17-38.12)                      | 40.22(44.77-35.89) | 86.30(94.98-79.62)  | 40.49(45.00-35.62) | 29.94(37.81-23.51)   | 33.20(36.52-30.04)          | 24.52(26.43-22.78) | 34.38(43.35-27.32) | 22.16(25.73-18.90) | 19.49(23.88-15.67)         | 30.69(33.45-28.37)         |                              |
| 2013 | both   | 39.30(41.01-37.93)                      | 40.55(45.13-36.08) | 85.66(94.38-79.28)  | 39.95(44.32-35.42) | 29.73(37.33-23.27)   | 33.41(37.00-29.94)          | 24.75(26.66-22.90) | 33.89(42.64-26.90) | 22.37(26.10-18.88) | 19.59(24.04-15.73)         | 31.24(34.08-28.71)         |                              |
| 2014 | both   | 39.31(40.93-37.79)                      | 41.01(46.02-36.17) | 87.17(97.19-80.79)  | 38.90(43.46-34.41) | 29.91(37.69-23.56)   | 33.66(37.33-30.25)          | 24.29(26.36-22.47) | 34.07(42.31-27.00) | 22.51(26.33-18.84) | 19.59(24.35-15.51)         | 31.93(34.84-29.24)         |                              |
| 2015 | both   | 39.47(41.31-37.78)                      | 41.65(47.50-36.40) | 88.16(98.78-81.37)  | 39.12(44.89-33.35) | 29.19(36.97-22.86)   | 34.00(37.75-30.16)          | 24.28(26.21-22.34) | 34.79(43.30-27.32) | 22.60(26.71-18.99) | 19.54(24.45-15.21)         | 32.67(35.74-29.88)         |                              |
| 2016 | both   | 40.18(42.30-38.16)                      | 42.30(48.41-36.70) | 88.13(98.96-81.41)  | 40.11(47.08-33.26) | 27.99(35.87-21.58)   | 34.41(38.55-30.83)          | 24.55(26.57-22.59) | 34.47(43.11-27.03) | 22.86(27.29-18.81) | 19.58(24.61-15.25)         | 33.42(36.90-30.13)         |                              |
| 2017 | both   | 40.81(43.73-37.90)                      | 42.56(49.76-36.21) | 89.18(103.21-78.48) | 40.94(49.66-33.18) | 28.69(37.41-22.14)   | 34.93(39.82-30.81)          | 24.96(27.52-22.70) | 35.09(44.46-27.55) | 23.11(27.71-18.71) | 19.83(25.00-15.34)         | 34.33(38.30-30.64)         |                              |
| 2018 | both   | 41.84(45.59-38.30)                      | 42.90(51.00-35.65) | 90.05(107.22-76.08) | 41.66(51.23-33.61) | 32.90(41.69-25.27)   | 35.59(40.59-31.40)          | 26.27(29.08-23.48) | 36.18(46.08-28.22) | 23.47(28.35-19.30) | 20.16(25.45-15.58)         | 35.31(39.62-31.24)         |                              |
| 2019 | both   | 43.02(47.87-38.74)                      | 43.38(51.75-35.56) | 90.78(110.47-73.76) | 42.56(52.99-34.03) | 35.52(43.91-28.09)   | 36.09(41.13-31.54)          | 27.07(30.48-23.98) | 36.32(46.58-28.73) | 23.61(28.75-18.96) | 20.20(25.76-15.44)         | 35.95(40.58-31.68)         |                              |

**Supplementary Table S5. Incident rates (A) and death rates (B) among 15-39 year-olds in different regions from 1990 to 2019.**

**B**

| Year | Gender | Incidence rate (per 100,000) NO. 95% UI |                    |                        |                        |                           |                          |                    |                    |                       |                    |
|------|--------|-----------------------------------------|--------------------|------------------------|------------------------|---------------------------|--------------------------|--------------------|--------------------|-----------------------|--------------------|
|      |        | Western Sub-Saharan Africa              |                    | Tropical Latin America | Southern Latin America | High-income North America | High-income Asia Pacific | Eastern Europe     | East Asia          | Central Latin America | Central Europe     |
|      |        |                                         |                    |                        |                        |                           |                          |                    |                    |                       |                    |
| 1990 | both   | 8.97(10.63-7.47)                        | 14.62(14.83-14.28) | 14.24(15.14-13.78)     | 18.52(19.05-18.05)     | 14.44(14.66-14.02)        | 14.66(14.95-14.14)       | 20.41(21.13-19.56) | 20.98(23.73-18.35) | 13.86(14.42-13.60)    | 20.74(21.15-20.36) |
| 1991 | both   | 9.02(10.68-7.54)                        | 14.65(14.87-14.29) | 14.01(14.77-13.58)     | 18.30(18.81-17.81)     | 14.39(14.60-13.95)        | 14.32(14.60-13.82)       | 21.13(21.81-20.31) | 20.96(23.61-18.59) | 13.87(14.42-13.61)    | 20.66(21.11-20.22) |
| 1992 | both   | 9.07(10.71-7.58)                        | 14.45(14.64-14.08) | 13.98(14.69-13.55)     | 18.14(18.65-17.70)     | 14.32(14.54-13.92)        | 13.98(14.24-13.49)       | 22.34(22.88-21.62) | 20.88(23.44-18.62) | 13.87(14.42-13.59)    | 20.30(20.85-19.76) |
| 1993 | both   | 9.10(10.62-7.52)                        | 14.22(14.40-13.85) | 14.17(14.94-13.78)     | 17.96(18.43-17.50)     | 14.39(14.64-14.01)        | 13.69(13.95-13.23)       | 24.81(25.43-24.15) | 20.73(23.10-18.35) | 13.96(14.45-13.70)    | 19.64(20.19-19.11) |
| 1994 | both   | 9.08(10.70-7.45)                        | 14.05(14.24-13.66) | 14.18(14.87-13.78)     | 17.85(18.34-17.40)     | 14.30(14.55-13.93)        | 13.49(13.74-13.04)       | 26.15(26.90-25.48) | 21.39(23.57-19.31) | 14.01(14.46-13.76)    | 19.23(19.74-18.75) |
| 1995 | both   | 9.05(10.74-7.51)                        | 13.94(14.12-13.54) | 14.29(14.95-13.93)     | 17.68(18.16-17.25)     | 14.13(14.40-13.77)        | 13.31(13.57-12.90)       | 25.43(26.11-24.81) | 22.07(24.07-20.04) | 13.87(14.27-13.56)    | 18.92(19.27-18.52) |
| 1996 | both   | 9.02(10.67-7.47)                        | 13.80(13.98-13.39) | 14.43(15.02-14.10)     | 17.58(18.07-17.16)     | 13.85(14.09-13.48)        | 13.09(13.34-12.72)       | 23.35(23.89-22.73) | 22.24(24.22-20.32) | 13.77(14.08-13.54)    | 18.15(18.44-17.78) |
| 1997 | both   | 9.05(10.83-7.45)                        | 13.76(13.94-13.35) | 14.41(14.90-14.06)     | 17.17(17.61-16.78)     | 13.59(13.85-13.24)        | 12.87(13.11-12.52)       | 21.30(21.80-20.65) | 22.34(24.20-20.36) | 13.70(13.98-13.45)    | 17.72(18.01-17.37) |
| 1998 | both   | 9.08(10.79-7.40)                        | 13.57(13.74-13.14) | 14.38(14.78-14.03)     | 16.77(17.21-16.41)     | 13.14(13.40-12.81)        | 12.75(12.97-12.43)       | 20.13(20.69-19.49) | 22.93(24.79-21.06) | 13.64(13.94-13.37)    | 16.94(17.18-16.57) |
| 1999 | both   | 9.08(11.04-7.38)                        | 13.42(13.60-12.98) | 14.34(14.70-13.99)     | 16.43(16.85-16.07)     | 12.77(13.05-12.46)        | 12.46(12.66-12.14)       | 20.53(21.07-19.98) | 23.26(25.01-21.61) | 13.50(13.75-13.24)    | 16.43(16.66-16.05) |
| 2000 | both   | 9.02(10.86-7.33)                        | 13.33(13.51-12.86) | 14.21(14.56-13.78)     | 15.99(16.37-15.63)     | 12.53(12.82-12.26)        | 12.08(12.27-11.76)       | 20.39(20.96-19.87) | 23.51(25.42-21.75) | 13.33(13.57-13.05)    | 15.79(16.04-15.39) |
| 2001 | both   | 9.10(11.04-7.29)                        | 13.14(13.32-12.67) | 14.14(14.48-13.74)     | 15.83(16.21-15.46)     | 12.42(12.76-12.20)        | 11.61(11.80-11.27)       | 19.71(20.29-19.21) | 23.13(25.08-21.28) | 13.20(13.44-12.91)    | 15.40(15.66-14.99) |
| 2002 | both   | 9.04(11.02-7.36)                        | 12.89(13.07-12.41) | 14.09(14.38-13.70)     | 15.40(15.76-15.03)     | 12.17(12.56-11.98)        | 11.29(11.47-10.96)       | 19.26(19.88-18.80) | 21.63(23.41-20.02) | 13.28(13.53-12.99)    | 15.14(15.40-14.69) |
| 2003 | both   | 9.00(10.90-7.29)                        | 12.57(12.75-12.11) | 13.97(14.27-13.57)     | 14.97(15.30-14.61)     | 11.83(12.21-11.64)        | 11.16(11.32-10.88)       | 19.02(19.75-18.62) | 20.40(21.92-18.91) | 13.27(13.52-12.95)    | 15.11(15.35-14.62) |
| 2004 | both   | 8.97(10.86-7.26)                        | 12.23(12.42-11.74) | 13.95(14.27-13.56)     | 14.70(15.03-14.32)     | 11.46(11.85-11.26)        | 11.00(11.16-10.71)       | 18.87(19.73-18.51) | 19.81(21.29-18.43) | 13.12(13.39-12.79)    | 15.00(15.26-14.46) |
| 2005 | both   | 8.89(10.75-7.14)                        | 11.94(12.12-11.44) | 13.73(14.05-13.33)     | 14.54(14.86-14.14)     | 11.27(11.68-11.07)        | 10.79(10.94-10.50)       | 19.39(20.38-18.89) | 18.91(20.23-17.59) | 13.09(13.36-12.76)    | 15.06(15.30-14.54) |
| 2006 | both   | 8.80(10.80-7.09)                        | 11.70(11.89-11.18) | 13.77(14.09-13.35)     | 14.48(14.81-14.11)     | 11.14(11.55-10.96)        | 10.55(10.72-10.23)       | 18.53(19.50-18.18) | 17.93(19.22-16.71) | 13.12(13.39-12.80)    | 14.92(15.18-14.38) |
| 2007 | both   | 8.77(10.60-7.01)                        | 11.54(11.73-11.03) | 13.82(14.14-13.40)     | 14.82(15.15-14.48)     | 10.88(11.27-10.70)        | 10.48(10.65-10.18)       | 18.34(19.22-18.00) | 17.29(18.63-16.17) | 12.99(13.26-12.68)    | 14.97(15.21-14.46) |
| 2008 | both   | 8.70(10.64-6.90)                        | 11.37(11.56-10.85) | 13.89(14.22-13.47)     | 14.78(15.12-14.44)     | 10.67(11.04-10.49)        | 10.50(10.65-10.21)       | 18.49(19.28-18.13) | 17.02(18.33-15.90) | 13.22(13.47-12.93)    | 14.87(15.13-14.36) |
| 2009 | both   | 8.79(10.76-7.09)                        | 11.18(11.37-10.66) | 14.06(14.37-13.70)     | 15.02(15.37-14.68)     | 10.53(10.89-10.35)        | 10.45(10.62-10.17)       | 17.65(18.22-17.34) | 16.90(18.17-15.82) | 13.44(13.70-13.17)    | 14.81(15.07-14.29) |
| 2010 | both   | 8.88(10.66-7.05)                        | 10.91(11.09-10.38) | 14.03(14.36-13.67)     | 14.88(15.24-14.54)     | 10.25(10.62-10.06)        | 10.25(10.42-9.94)        | 17.78(18.30-17.50) | 16.63(18.03-15.37) | 13.32(13.59-13.04)    | 14.54(14.81-14.00) |
| 2011 | both   | 9.02(11.07-7.22)                        | 10.63(10.82-10.11) | 14.12(14.46-13.78)     | 14.88(15.23-14.54)     | 10.10(10.47-9.92)         | 9.99(10.15-9.64)         | 17.25(17.68-16.90) | 15.91(17.36-14.70) | 13.14(13.42-12.85)    | 14.38(14.66-13.83) |
| 2012 | both   | 9.12(11.09-7.44)                        | 10.31(10.51-9.77)  | 14.14(14.47-13.82)     | 14.96(15.31-14.60)     | 9.95(10.35-9.77)          | 9.56(9.75-9.17)          | 17.34(17.76-16.98) | 15.20(16.47-14.01) | 13.06(13.32-12.77)    | 14.34(14.63-13.79) |
| 2013 | both   | 9.24(11.25-7.55)                        | 10.10(10.30-9.55)  | 14.19(14.54-13.86)     | 14.99(15.35-14.61)     | 9.91(10.35-9.71)          | 9.21(9.41-8.80)          | 17.85(18.27-17.49) | 15.01(16.30-13.78) | 13.26(13.53-12.96)    | 14.16(14.47-13.58) |
| 2014 | both   | 9.35(11.29-7.57)                        | 9.94(10.16-9.38)   | 14.14(14.52-13.81)     | 14.80(15.19-14.40)     | 10.00(10.50-9.77)         | 8.95(9.16-8.51)          | 18.31(18.70-17.94) | 15.19(16.60-13.82) | 13.75(14.06-13.42)    | 14.35(14.67-13.73) |
| 2015 | both   | 9.29(11.32-7.50)                        | 9.89(10.11-9.33)   | 14.16(14.53-13.82)     | 14.89(15.31-14.44)     | 10.21(10.79-9.89)         | 8.64(8.90-8.15)          | 19.63(20.16-19.23) | 15.09(16.66-13.65) | 13.83(14.39-13.31)    | 14.45(14.76-13.87) |
| 2016 | both   | 9.36(11.39-7.48)                        | 9.84(10.09-9.28)   | 14.30(14.64-13.96)     | 15.18(15.64-14.69)     | 10.49(11.21-10.03)        | 8.46(8.75-7.97)          | 19.23(19.71-18.83) | 15.25(17.11-13.65) | 13.90(14.69-13.24)    | 14.31(14.67-13.71) |
| 2017 | both   | 9.36(11.51-7.48)                        | 9.88(10.16-9.32)   | 13.94(14.31-13.58)     | 15.26(15.82-14.72)     | 10.40(11.11-9.90)         | 8.33(8.66-7.83)          | 18.80(19.48-18.13) | 15.74(17.70-13.87) | 14.13(15.32-13.08)    | 14.36(15.22-13.58) |
| 2018 | both   | 9.28(11.41-7.35)                        | 10.03(10.32-9.46)  | 13.99(14.46-13.55)     | 15.24(15.84-14.64)     | 10.02(10.64-9.56)         | 8.39(8.73-7.94)          | 19.09(20.66-17.62) | 16.26(18.47-14.18) | 14.18(16.03-12.57)    | 14.47(16.07-13.07) |
| 2019 | both   | 9.18(11.38-7.16)                        | 10.12(10.42-9.55)  | 14.00(14.57-13.46)     | 15.24(15.92-14.57)     | 9.74(10.36-9.28)          | 8.45(8.80-7.97)          | 19.38(21.66-17.38) | 16.60(18.94-14.33) | 13.84(16.11-11.77)    | 14.56(16.51-12.73) |

Supplementary Table S5 (continued). Incident rates (A) and death rates (B) among 15-39 year-olds in different regions from 1990 to 2019.

B (continued)

| Year | Gender | Incidence rate (per 100,000) NO. 95% UI |                    |                    |                      |                             |                    |                    |                    |                            |                            |                              |
|------|--------|-----------------------------------------|--------------------|--------------------|----------------------|-----------------------------|--------------------|--------------------|--------------------|----------------------------|----------------------------|------------------------------|
|      |        | Central Asia                            | Caribbean          | Australasia        | Andean Latin America | Southern Sub-Saharan Africa | Southeast Asia     | South Asia         | Oceania            | Eastern Sub-Saharan Africa | Central Sub-Saharan Africa | North Africa and Middle East |
| 1990 | both   | 19.90(20.49-19.37)                      | 15.20(16.69-13.25) | 13.69(14.12-13.28) | 15.85(17.57-14.27)   | 16.48(18.14-15.06)          | 15.55(17.26-13.60) | 12.24(13.39-11.05) | 16.31(19.15-13.50) | 13.20(15.37-10.92)         | 11.54(13.97-9.27)          | 12.29(13.57-11.01)           |
| 1991 | both   | 20.44(21.00-19.91)                      | 15.11(16.55-13.25) | 13.59(14.01-13.18) | 15.51(17.18-14.11)   | 16.37(17.99-15.02)          | 15.66(17.35-13.70) | 12.19(13.30-11.06) | 16.44(19.39-13.55) | 13.22(15.43-10.99)         | 11.65(14.03-9.28)          | 12.20(13.43-10.99)           |
| 1992 | both   | 21.72(22.45-21.06)                      | 15.30(16.74-13.50) | 13.41(13.80-13.01) | 16.06(17.79-14.49)   | 17.37(19.23-16.00)          | 15.79(17.41-13.89) | 12.26(13.32-11.12) | 16.51(19.58-13.57) | 13.22(15.32-11.03)         | 11.56(13.96-9.36)          | 12.18(13.41-10.99)           |
| 1993 | both   | 22.48(23.36-21.70)                      | 15.49(16.97-13.65) | 13.29(13.67-12.88) | 16.12(17.69-14.73)   | 15.68(17.09-14.28)          | 15.98(17.59-14.03) | 12.26(13.31-11.20) | 16.39(19.54-13.33) | 13.19(15.28-11.06)         | 11.44(13.77-9.37)          | 12.18(13.38-11.00)           |
| 1994 | both   | 23.15(24.08-22.32)                      | 15.31(16.71-13.52) | 13.31(13.73-12.91) | 16.38(18.18-14.82)   | 15.86(17.30-14.43)          | 16.19(17.80-14.25) | 12.36(13.38-11.33) | 16.30(19.68-13.24) | 13.15(15.20-11.11)         | 11.34(13.65-9.24)          | 12.15(13.37-10.95)           |
| 1995 | both   | 22.65(23.44-21.93)                      | 15.49(16.92-13.71) | 13.40(13.82-13.02) | 16.40(18.19-14.84)   | 14.78(16.32-13.24)          | 16.50(18.20-14.46) | 12.39(13.36-11.37) | 16.33(19.69-13.19) | 13.02(15.02-11.04)         | 11.35(13.63-9.25)          | 12.07(13.30-10.92)           |
| 1996 | both   | 22.32(23.06-21.68)                      | 15.48(16.93-13.81) | 13.39(13.84-13.02) | 16.18(17.46-14.87)   | 13.16(15.05-11.51)          | 16.78(18.48-14.76) | 12.33(13.26-11.30) | 16.57(20.01-13.40) | 12.95(14.97-11.02)         | 11.29(13.58-9.25)          | 11.98(13.19-10.84)           |
| 1997 | both   | 21.81(22.59-21.17)                      | 15.60(17.01-13.93) | 13.48(13.96-13.12) | 16.18(17.49-14.94)   | 14.13(16.01-12.46)          | 16.65(18.45-14.72) | 12.68(13.68-11.64) | 16.63(20.22-13.26) | 12.86(14.80-10.96)         | 10.90(13.06-8.93)          | 11.87(13.08-10.76)           |
| 1998 | both   | 21.16(21.78-20.59)                      | 15.63(17.00-14.09) | 13.54(14.07-13.16) | 16.15(17.70-14.83)   | 14.64(16.71-12.95)          | 16.65(18.42-14.62) | 12.95(13.97-11.97) | 16.80(20.47-13.37) | 12.84(14.68-10.98)         | 10.94(13.05-9.00)          | 11.70(12.86-10.65)           |
| 1999 | both   | 20.49(21.12-19.89)                      | 15.66(16.97-14.14) | 13.36(13.94-13.00) | 15.75(17.41-14.26)   | 15.36(17.84-13.37)          | 16.81(18.66-14.88) | 13.25(14.29-12.25) | 17.05(20.88-13.45) | 12.66(14.47-10.91)         | 11.11(13.16-9.16)          | 11.67(12.76-10.65)           |
| 2000 | both   | 20.19(20.85-19.62)                      | 15.65(16.97-14.20) | 12.95(13.45-12.60) | 15.77(17.52-14.17)   | 17.15(20.05-14.84)          | 16.81(18.57-14.92) | 13.38(14.50-12.42) | 17.01(20.74-13.46) | 12.43(14.18-10.75)         | 11.05(13.03-9.06)          | 11.46(12.48-10.51)           |
| 2001 | both   | 19.68(20.27-19.17)                      | 15.65(17.08-14.11) | 12.35(12.83-12.04) | 15.41(17.11-13.84)   | 17.41(20.69-14.84)          | 16.75(18.68-14.89) | 13.31(14.36-12.27) | 17.10(20.87-13.52) | 12.10(13.64-10.46)         | 10.89(12.82-9.02)          | 11.26(12.31-10.31)           |
| 2002 | both   | 19.10(19.64-18.57)                      | 15.40(16.79-13.83) | 11.94(12.38-11.64) | 15.86(17.73-14.19)   | 18.49(22.49-15.64)          | 16.78(18.48-15.10) | 13.12(14.16-12.09) | 17.31(21.34-13.76) | 11.96(13.46-10.44)         | 10.74(12.76-8.91)          | 10.99(12.00-10.02)           |
| 2003 | both   | 18.50(19.07-17.98)                      | 15.46(16.91-13.83) | 11.67(12.16-11.37) | 16.03(17.70-14.31)   | 19.36(24.09-15.89)          | 16.73(18.48-15.09) | 12.64(13.55-11.75) | 17.33(21.47-13.90) | 11.95(13.37-10.53)         | 10.84(12.83-8.98)          | 10.87(11.89-9.91)            |
| 2004 | both   | 18.17(18.76-17.64)                      | 15.37(16.92-13.64) | 11.52(11.93-11.21) | 15.64(17.37-13.99)   | 19.50(24.81-15.69)          | 16.33(17.84-14.80) | 12.52(13.43-11.64) | 17.39(21.71-13.92) | 11.95(13.28-10.61)         | 10.72(12.73-9.00)          | 10.83(11.82-9.87)            |
| 2005 | both   | 18.38(19.02-17.83)                      | 15.26(17.07-13.40) | 11.14(11.49-10.79) | 15.59(17.26-13.94)   | 18.91(24.34-15.08)          | 16.00(17.42-14.42) | 12.71(13.66-11.78) | 17.63(22.07-14.12) | 11.93(13.30-10.60)         | 10.58(12.56-8.90)          | 10.81(11.82-9.90)            |
| 2006 | both   | 18.18(18.93-17.50)                      | 15.11(17.15-13.12) | 11.03(11.35-10.67) | 15.29(17.01-13.70)   | 18.47(23.74-14.56)          | 15.73(17.25-14.20) | 12.84(13.75-11.98) | 17.62(22.02-14.05) | 11.86(13.16-10.55)         | 10.51(12.53-8.77)          | 10.80(11.79-9.91)            |
| 2007 | both   | 17.95(18.75-17.24)                      | 15.03(17.12-12.93) | 11.30(11.64-10.91) | 15.03(16.50-13.52)   | 17.31(22.11-13.63)          | 15.49(16.88-14.09) | 12.82(13.71-11.93) | 17.79(22.25-14.20) | 11.84(13.16-10.47)         | 10.35(12.46-8.62)          | 10.80(11.82-9.91)            |
| 2008 | both   | 17.57(18.30-16.92)                      | 14.99(17.10-12.91) | 11.38(11.73-10.96) | 15.34(16.83-13.82)   | 16.92(21.63-13.18)          | 15.34(16.71-14.01) | 12.97(13.87-12.06) | 17.62(22.02-13.96) | 11.78(13.19-10.38)         | 10.31(12.39-8.53)          | 10.86(11.87-9.95)            |
| 2009 | both   | 17.07(17.58-16.53)                      | 14.70(16.84-12.57) | 11.32(11.65-10.90) | 16.10(17.67-14.46)   | 16.10(20.52-12.51)          | 15.24(16.70-13.83) | 12.89(13.78-12.03) | 17.37(21.87-13.80) | 11.77(13.20-10.31)         | 10.29(12.34-8.47)          | 10.95(11.97-10.06)           |
| 2010 | both   | 16.88(17.34-16.31)                      | 14.37(16.48-12.30) | 11.10(11.44-10.69) | 16.17(18.09-14.22)   | 15.01(19.26-11.47)          | 15.05(16.46-13.61) | 13.00(13.94-12.12) | 17.84(22.25-14.35) | 11.80(13.34-10.29)         | 10.30(12.42-8.48)          | 11.07(12.17-10.17)           |
| 2011 | both   | 16.87(17.35-16.26)                      | 14.57(16.56-12.59) | 10.87(11.18-10.45) | 15.92(17.99-13.79)   | 13.73(17.64-10.55)          | 14.91(16.43-13.56) | 12.97(13.86-12.07) | 18.08(22.54-14.47) | 11.80(13.48-10.18)         | 10.32(12.43-8.51)          | 11.14(12.26-10.25)           |
| 2012 | both   | 16.91(17.36-16.28)                      | 14.73(16.69-12.73) | 10.45(10.76-10.02) | 15.68(17.60-13.64)   | 13.40(16.97-10.34)          | 14.76(16.32-13.33) | 12.67(13.56-11.77) | 17.93(22.56-14.46) | 11.75(13.50-10.14)         | 10.29(12.42-8.46)          | 11.20(12.32-10.30)           |
| 2013 | both   | 16.72(17.23-16.08)                      | 14.93(17.03-12.83) | 10.25(10.56-9.85)  | 15.20(16.81-13.41)   | 13.17(16.54-10.28)          | 14.72(16.26-13.30) | 12.67(13.59-11.70) | 17.67(22.24-14.20) | 11.82(13.57-10.13)         | 10.34(12.62-8.42)          | 11.25(12.44-10.29)           |
| 2014 | both   | 16.58(17.13-15.91)                      | 15.21(17.35-12.99) | 10.26(10.58-9.88)  | 14.61(16.40-12.79)   | 13.11(16.57-10.23)          | 14.72(16.37-13.19) | 12.35(13.20-11.49) | 17.73(22.23-14.13) | 11.86(13.76-10.12)         | 10.35(12.66-8.31)          | 11.32(12.55-10.32)           |
| 2015 | both   | 16.46(17.15-15.65)                      | 15.45(17.89-13.08) | 10.25(10.61-9.86)  | 14.41(16.47-12.34)   | 12.70(16.22-9.84)           | 14.78(16.51-13.27) | 12.25(13.14-11.34) | 18.05(22.50-14.36) | 11.86(13.82-10.08)         | 10.30(12.60-8.18)          | 11.36(12.62-10.29)           |
| 2016 | both   | 16.58(17.39-15.73)                      | 15.62(18.27-13.15) | 10.23(10.63-9.81)  | 14.43(17.07-11.89)   | 12.09(15.68-9.17)           | 14.81(16.54-13.22) | 12.31(13.24-11.34) | 17.82(22.35-14.05) | 11.92(14.01-10.02)         | 10.28(12.72-8.07)          | 11.41(12.81-10.25)           |
| 2017 | both   | 16.66(17.77-15.48)                      | 15.67(18.41-13.01) | 10.28(10.72-9.82)  | 14.56(17.53-11.73)   | 12.36(15.87-9.30)           | 14.86(16.71-13.21) | 12.43(13.50-11.30) | 18.02(22.72-14.25) | 11.95(14.25-9.94)          | 10.34(12.81-8.07)          | 11.53(13.14-10.18)           |
| 2018 | both   | 16.95(18.48-15.50)                      | 15.71(18.87-12.80) | 10.33(10.80-9.84)  | 14.65(17.88-11.66)   | 14.09(17.56-10.89)          | 14.92(17.09-13.10) | 12.88(14.26-11.50) | 18.43(23.52-14.48) | 12.03(14.37-9.96)          | 10.43(12.90-8.04)          | 11.61(13.42-10.19)           |
| 2019 | both   | 17.32(19.33-15.57)                      | 15.81(18.93-12.70) | 10.35(10.86-9.83)  | 14.84(18.70-11.72)   | 15.02(18.28-11.89)          | 14.93(16.90-13.12) | 13.11(14.64-11.66) | 18.42(23.71-14.61) | 12.02(14.37-9.79)          | 10.39(13.00-7.88)          | 11.63(13.47-10.16)           |

**Supplementary Table S6. Included countries (n=204) according to the five level socio-demographic index (SDI) in 2019**

**Low=0<SDI≤0.454743, Low-Middle= 0.454743<SDI≤0.607679, Middle=0.607679<SDI≤0.689504, High-Middle=0.689504<SDI≤0.805129, High=0.805129<SDI≤1)**

| Low(n=33)                | Low-Middle (n=42)              | Middle (n=41)                    | High-Middle (n=47)       |           | High (n=41)                |
|--------------------------|--------------------------------|----------------------------------|--------------------------|-----------|----------------------------|
| Pakistan                 | Mongolia                       | Thailand                         | Israel                   | Uruguay   | Switzerland                |
| Haiti                    | Belize                         | Panama                           | Poland                   | Moldova   | Norway                     |
| Rwanda                   | Kyrgyzstan                     | China                            | Italy                    | Sri Lanka | Monaco                     |
| Tanzania                 | Dominican Republic             | Equatorial Guinea                | Malta                    | Armenia   | Germany                    |
| Nepal                    | Tuvalu                         | Jamaica                          | Virgin Islands           |           | Luxembourg                 |
| Togo                     | Palestine                      | Azerbaijan                       | The Bahamas              |           | Andorra                    |
| Yemen                    | Federated States of Micronesia | Albania                          | Croatia                  |           | Denmark                    |
| Côte d'Ivoire            | eSwatini                       | Costa Rica                       | Greece                   |           | San Marino                 |
| Solomon Islands          | El Salvador                    | South Africa                     | Hungary                  |           | Netherlands                |
| Uganda                   | Congo (Brazzaville)            | Tunisia                          | Montenegro               |           | United Arab Emirates       |
| The Gambia               | Bolivia                        | Iraq                             | Oman                     |           | South Korea                |
| Eritrea                  | India                          | Turkmenistan                     | Northern Mariana Islands |           | Canada                     |
| Madagascar               | Maldives                       | Saint Lucia                      | Serbia                   |           | Sweden                     |
| Papua New Guinea         | North Korea                    | Iran                             | Spain                    |           | Japan                      |
| Senegal                  | Ghana                          | Grenada                          | Bulgaria                 |           | Iceland                    |
| Malawi                   | Morocco                        | Cuba                             | Cook Islands             |           | Taiwan (province of China) |
| DR Congo                 | Marshall Islands               | Fiji                             | Greenland                |           | Ireland                    |
| Liberia                  | Tajikistan                     | Indonesia                        | Romania                  |           | Singapore                  |
| South Sudan              | Kiribati                       | Egypt                            | Chile                    |           | USA                        |
| Guinea-Bissau            | Guatemala                      | Gabon                            | Trinidad and Tobago      |           | Finland                    |
| Benin                    | Cape Verde                     | Algeria                          | Bahrain                  |           | Belgium                    |
| Sierra Leone             | Myanmar                        | Mexico                           | Turkey                   |           | Kuwait                     |
| Afghanistan              | Nicaragua                      | Peru                             | Saint Kitts and Nevis    |           | Austria                    |
| Ethiopia                 | Sudan                          | Samoa                            | Belarus                  |           | UK                         |
| Guinea                   | Nigeria                        | Ecuador                          | North Macedonia          |           | Lithuania                  |
| Mozambique               | Timor-Leste                    | Brazil                           | Portugal                 |           | Cyprus                     |
| Burundi                  | Kenya                          | Paraguay                         | Antigua and Barbuda      |           | Slovenia                   |
| Central African Republic | Lesotho                        | Suriname                         | Barbados                 |           | New Zealand                |
| Mali                     | Zambia                         | Tonga                            | Palau                    |           | Australia                  |
| Burkina Faso             | São Tomé and Príncipe          | Botswana                         | Malaysia                 |           | Estonia                    |
| Chad                     | Honduras                       | Colombia                         | Ukraine                  |           | France                     |
| Niger                    | Mauritania                     | Uzbekistan                       | Jordan                   |           | Qatar                      |
| Somalia                  | Laos                           | Saint Vincent and the Grenadines | Dominica                 |           | Czech Republic             |
|                          | Cameroon                       | Tokelau                          | Seychelles               |           | Brunei                     |
|                          | Vanuatu                        | Philippines                      | Kazakhstan               |           | Latvia                     |
|                          | Bangladesh                     | Syria                            | Bosnia and Herzegovina   |           | Puerto Rico                |
|                          | Zimbabwe                       | Guyana                           | American Samoa           |           | Bermuda                    |
|                          | Angola                         | Nauru                            | Niue                     |           | Guam                       |
|                          | Cambodia                       | Vietnam                          | Libya                    |           | Slovakia                   |
|                          | Djibouti                       | Namibia                          | Argentina                |           | Russia                     |
|                          | Bhutan                         | Venezuela                        | Lebanon                  |           | Saudi Arabia               |
|                          | Comoros                        |                                  | Mauritius                |           |                            |
|                          |                                |                                  | Georgia                  |           |                            |
